# Supplementary material
Source: PubMed Central journal article supplement (PMC3784328)
Supplement: NIHMS50099-supplement-1.pdf [file NIHMS50099-supplement-1.pdf]

## Supplementary Information:

### Mapping *cis* and *trans* regulatory effects across multiple tissues in twins

Elin Grundberg<sup>1,2\*</sup>, Kerrin S. Small<sup>1,2\*</sup>, Åsa K. Hedman<sup>3\*</sup>, Alexandra C. Nica<sup>4,5\*</sup>, Alfonso Buil<sup>4,5\*</sup>, Sarah Keildson<sup>3</sup>, Jordana T. Bell<sup>2,3</sup>, Tsun-Po Yang<sup>1</sup>, Eshwar Meduri<sup>1,2</sup>, Amy Barrett<sup>6</sup>, James Nisbet<sup>1</sup>, Magdalena Sekowska<sup>1</sup>, Alicja Wilk<sup>1</sup>, So-Youn Shin<sup>1</sup>, Daniel Glass<sup>2</sup>, Mary Travers<sup>6</sup>, Josine L. Min<sup>3</sup>, Sue Ring<sup>7</sup>, Karen Ho<sup>7</sup>, Gudmar Thorleifsson<sup>8</sup>, Augustine Kong<sup>8</sup>, Unnur Thorsteindottir<sup>8,9</sup>, Chrysanthi Ainali<sup>10</sup>, Antigone S. Dimas<sup>4,5</sup>, Neelam Hassanali<sup>6</sup>, Catherine Ingle<sup>1</sup>, David Knowles<sup>11</sup>, Maria Krestyaninova<sup>12</sup>, Christopher E. Lowe<sup>13, 14</sup>, Paola Di Meglio<sup>15</sup>, Stephen B. Montgomery<sup>4,5,17</sup>, Leopold Parts<sup>1</sup>, Simon Potter<sup>1</sup>, Gabriela Surdulescu<sup>2</sup>, Loukia Tsaprouni<sup>1</sup>, Sophia Tsoka<sup>10</sup>, Veronique Bataille<sup>2</sup>, Richard Durbin<sup>1</sup>, Frank O. Nestle<sup>15</sup>, Stephen O’Rahilly<sup>13,14</sup>, Nicole Soranzo<sup>1</sup>, Cecilia M. Lindgren<sup>3</sup>, Krina T. Zondervan<sup>3</sup>, Kourosh R. Ahmadi<sup>2</sup>, Eric E. Schadt<sup>16</sup>, Kari Stefansson<sup>8,9</sup>, George Davey Smith<sup>7</sup>, Mark I. McCarthy<sup>3,6</sup>, Panos Deloukas<sup>1</sup>, Emmanouil T. Dermitzakis<sup>4,5</sup>, Tim D. Spector<sup>2</sup>, for the MuTHER consortium<sup>18</sup>

## Contents

### Supplementary Figures

|                                      |    |
|--------------------------------------|----|
| <i>Supplementary Figure 1</i> .....  | 3  |
| <i>Supplementary Figure 2</i> .....  | 4  |
| <i>Supplementary Figure 3</i> .....  | 5  |
| <i>Supplementary Figure 4</i> .....  | 6  |
| <i>Supplementary Figure 5</i> .....  | 7  |
| <i>Supplementary Figure 6</i> .....  | 8  |
| <i>Supplementary Figure 7</i> .....  | 9  |
| <i>Supplementary Figure 8</i> .....  | 10 |
| <i>Supplementary Figure 9</i> .....  | 11 |
| <i>Supplementary Figure 10</i> ..... | 12 |

### Supplementary Tables

|                                     |    |
|-------------------------------------|----|
| <i>Supplementary Table 1</i> .....  | 13 |
| <i>Supplementary Table 2</i> .....  | 14 |
| <i>Supplementary Table 3</i> .....  | 15 |
| <i>Supplementary Table 4</i> .....  | 16 |
| <i>Supplementary Table 5</i> .....  | 17 |
| <i>Supplementary Table 6</i> .....  | 18 |
| <i>Supplementary Table 7</i> .....  | 19 |
| <i>Supplementary Table 8</i> .....  | 31 |
| <i>Supplementary Table 9</i> .....  | 31 |
| <i>Supplementary Table 10</i> ..... | 32 |

### Supplementary Notes

|                                           |    |
|-------------------------------------------|----|
| <i>MuTHER Consortium membership</i> ..... | 36 |
| <i>Acknowledgments</i> .....              | 36 |

## Supplementary Figures

### Supplementary Fig 1. Venn diagram of transcript heritability across tissues

**(A)** The top 5000 heritable transcripts in each tissue (of in total of ~20K transcripts) where included which corresponded to  $h^2_{\text{adipose}} > 0.33$ ,  $h^2_{\text{LCL}} > 0.27$  and  $h^2_{\text{skin}} > 0.22$ . **(B)** Venn diagram showing comparison of transcript heritability across tissues limited to transcripts expressed in all tissues. The top 2000 heritable expressed transcripts in each tissue (in total of 8619 transcripts expressed in all three tissues) where included corresponding to  $h^2_{\text{adipose}} > 0.41$ ,  $h^2_{\text{LCL}} > 0.33$  and  $h^2_{\text{skin}} > 0.28$ .

**A**

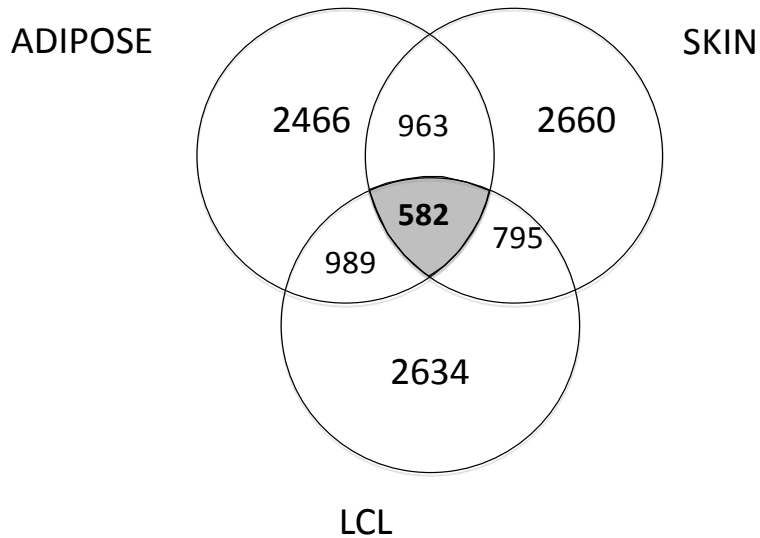

**B**

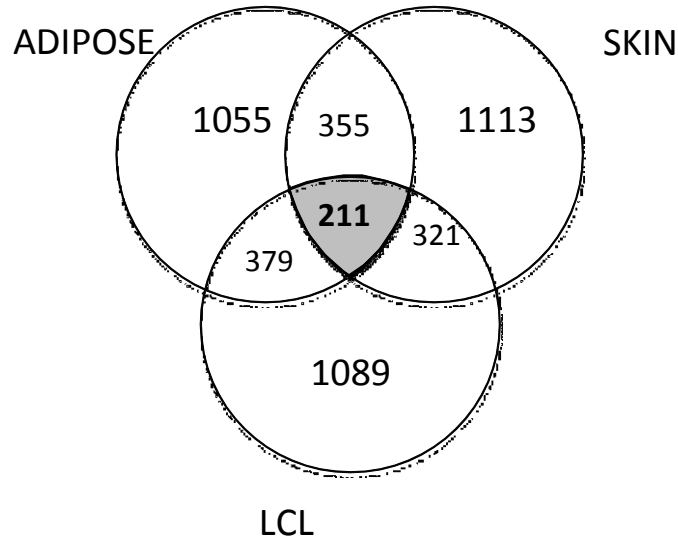

**Supplementary Fig 2. Validation of cis-eQTLs**

Top cis-eQTLs per transcript identified in the two-step statistical approach implemented in the GenABEL/ProbABEL were validated in a full linear mixed-effects model. The  $-\log_{10}$  p value from the mixed model (*y-axis*) is graphed against the  $-\log_{10}$  p value from ProbABEL (*x-axis*)

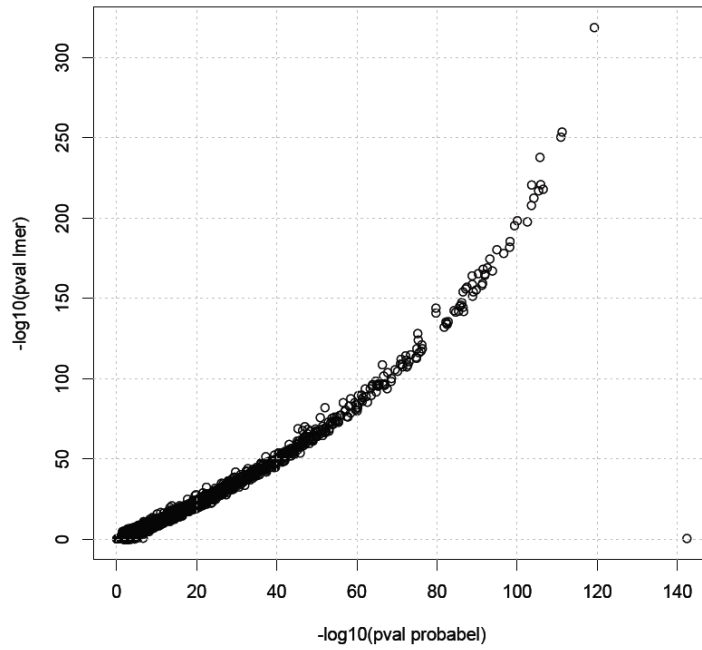

### Supplementary Fig 3. Replication of *cis*- and *trans* associations in independent cohorts

P-value distributions of *cis* (left panel) and *trans*-associations (right panel) identified in the MuTHER study in four different replication cohorts: MGH (adipose), ALSPAC (LCL), OXFORD (LCL) and GenCORD (skin/fibroblasts). *Cis*-associations identified at 1% FDR and *trans*-associations at  $P < 5 \times 10^{-8}$  were tested in the replication cohorts, respectively. The replication P-values from the different data sets were used to estimate  $\pi_0$  which is the overall proportion of true null hypotheses among all tests performed after which the proportion of significant replicated *cis* and *trans* results in each study,  $\pi_1$  could be calculated.

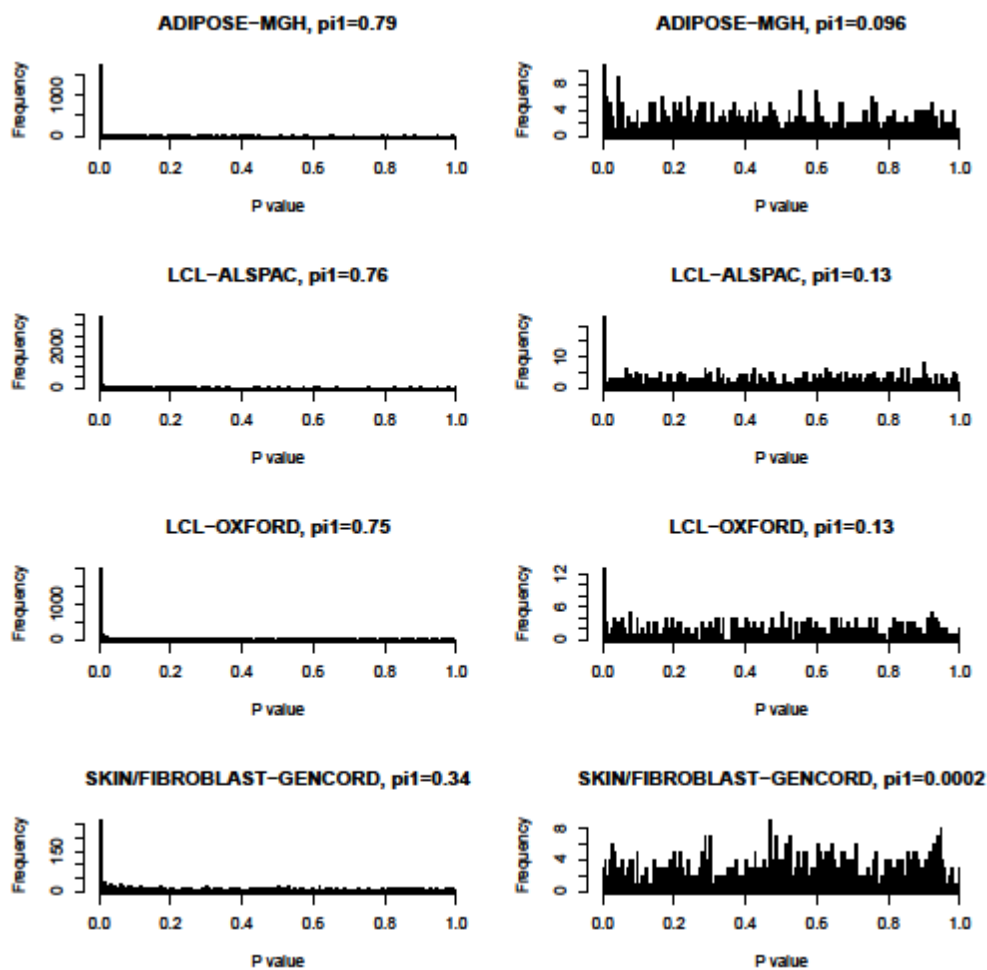

**Supplementary Fig 4. Tissue-independency of cis-eQTLs**

P-value distribution of cis-associations identified at 1% FDR in adipose (*upper panel*), LCL (*middle panel*) and skin tissue (*lower panel*) in corresponding comparing tissue.

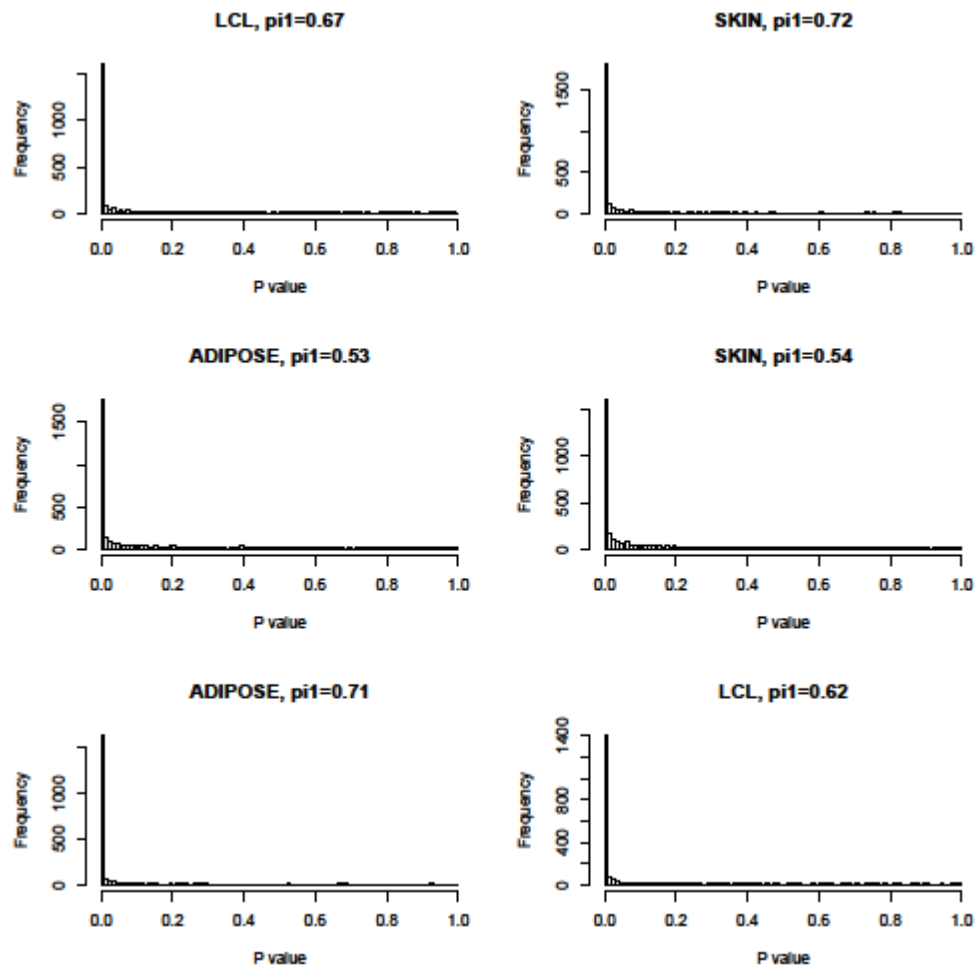

### Supplementary Fig 5. Properties of cis-eQTLs

Plots show the localization of cis-eQTLs in adipose (*upper panel*), LCL (*middle panel*) and skin (*lower panel*) with regards to transcription start site (TSS) for all cis-eQTLs identified at 1% FDR (*left panel*), tissue-dependent cis-eQTLs identified at 1% FDR in discovery tissue not meeting the same cut off in either of the other tissues (*middle panel*) and tissue-independent cis-eQTLs identified at 1 % FDR in at least two tissues (*right panel*).

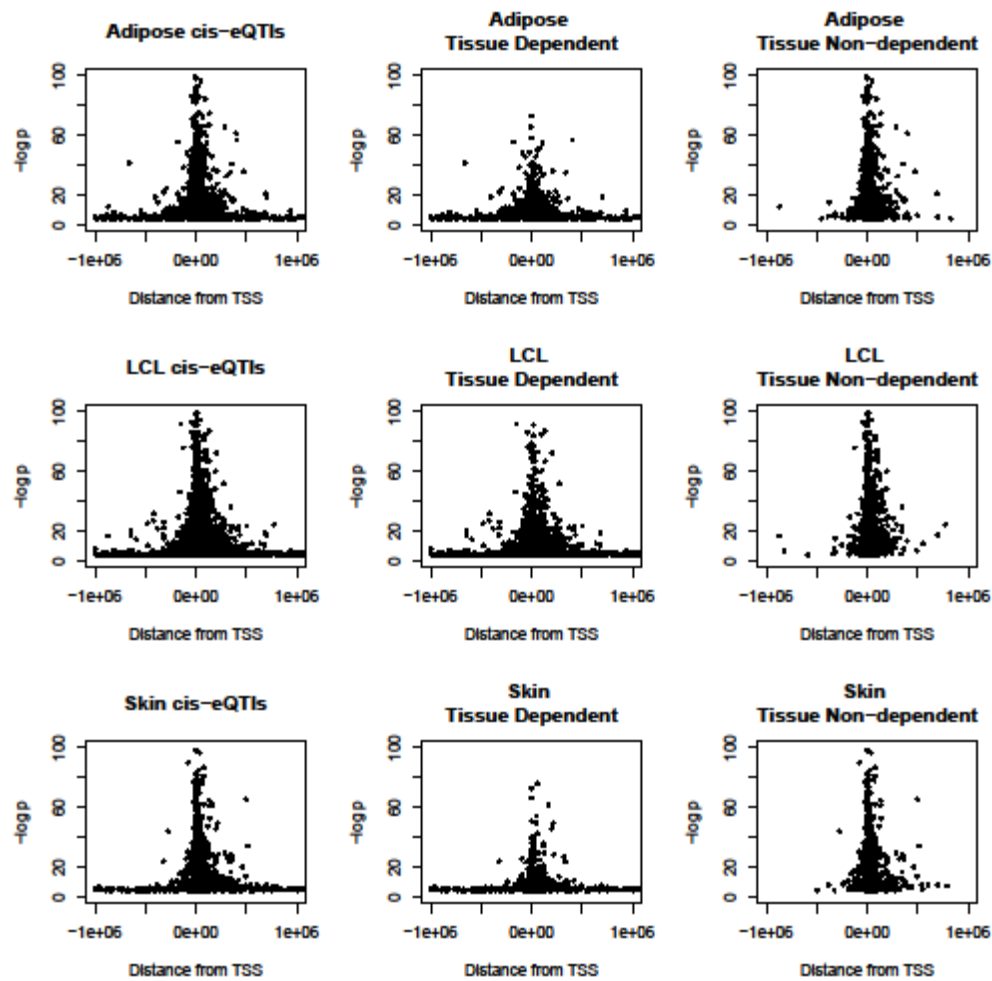

**Supplementary Fig 6. Properties of cis-eQTLs dependent on localization**

Histograms showing the coefficient of determination ( $R^2$ ) of cis-eQTLs identified at 1% FDR with either long-range effects (>200kb from TSS) (*left panel*) or located less than 200kb from TSS (*right panel*) in adipose (*upper panel*), LCL (*middle panel*) and skin tissue (*lower panel*) respectively.

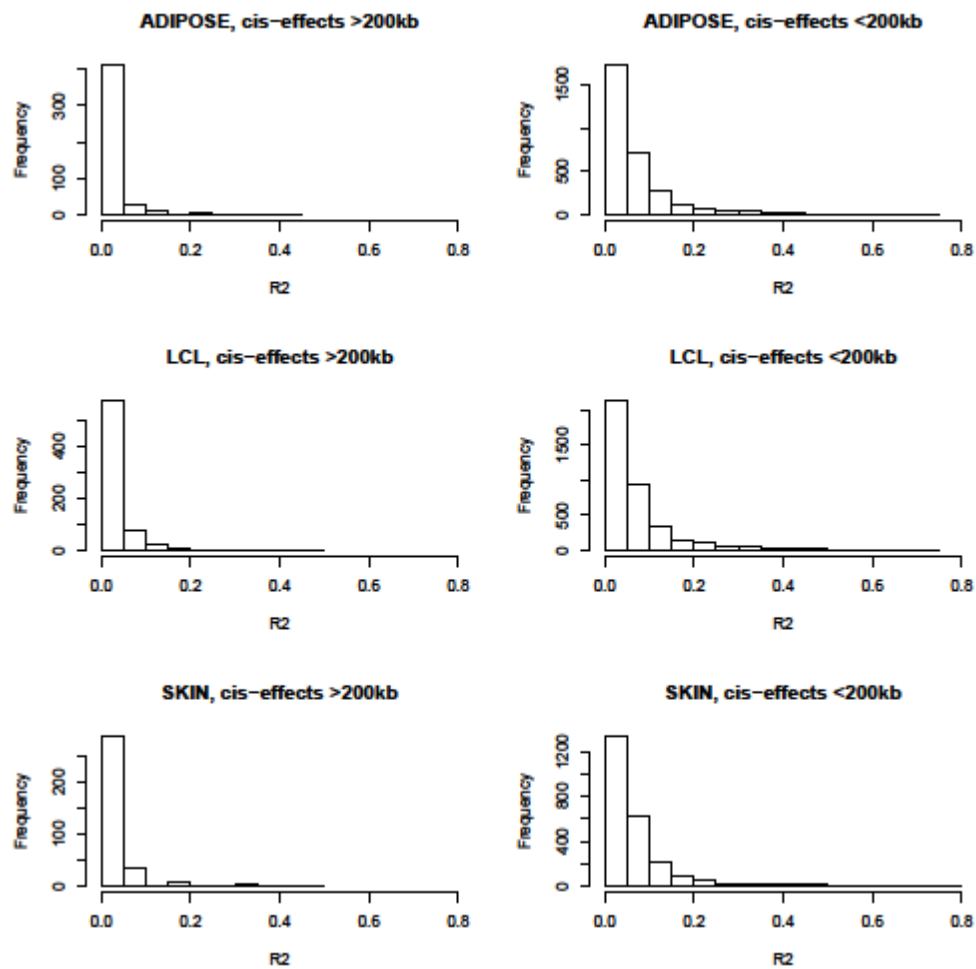



**Supplementary Fig 7. cis-eQTL mapping using matched co-twin design**

P-value distribution of cis-associations identified using a matched co-twin design at 1% FDR in adipose (*upper panel*), LCL (*middle panel*) and skin tissue (*lower panel*) in corresponding co-twin or tissue.

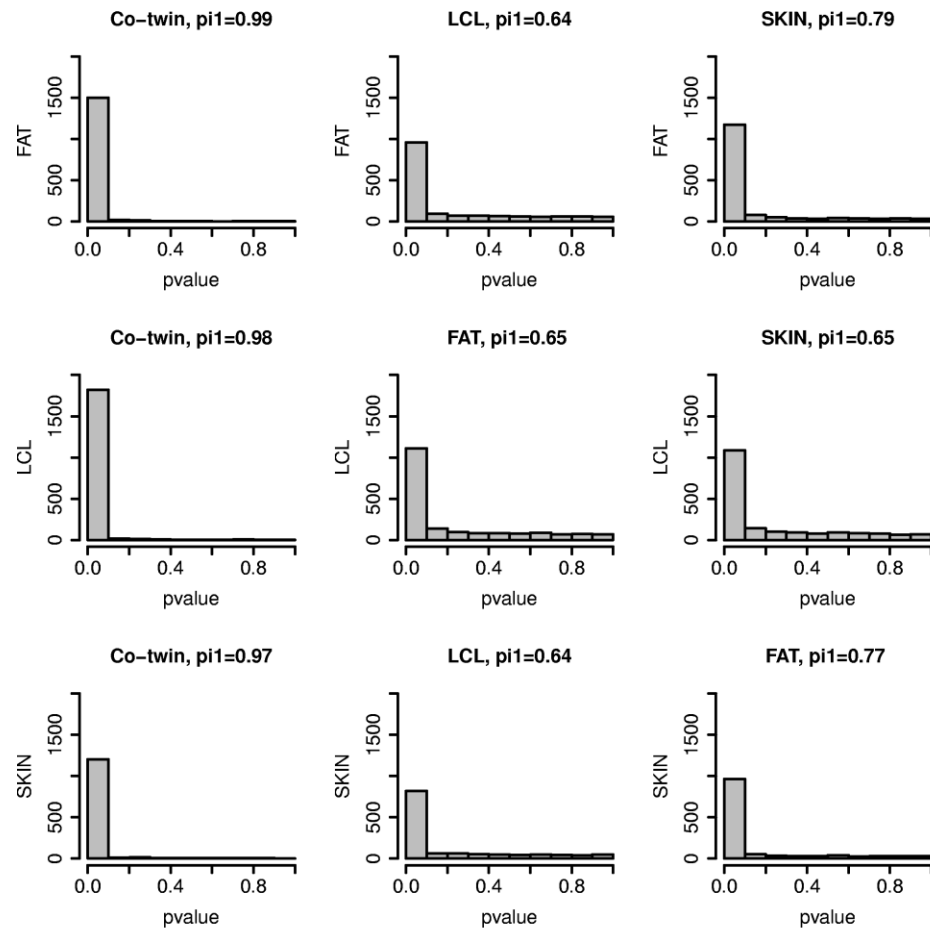

### Supplementary Fig 8. Expressions fold change within twins and across tissues for *cis*-eQTLs

Tissue-dependency of *cis*-eQTLs was evaluated by contrasting expression fold changes between tissues and estimating the predictive value ( $R^2$ ) of each tissue against the other two. The plotted fold change on the X and Y-axes was calculated as the difference in mean expression of homozygous genotypic classes. For each pair wise twin or tissue comparison, the predictive value ( $R^2$ ) between fold changes is shown.

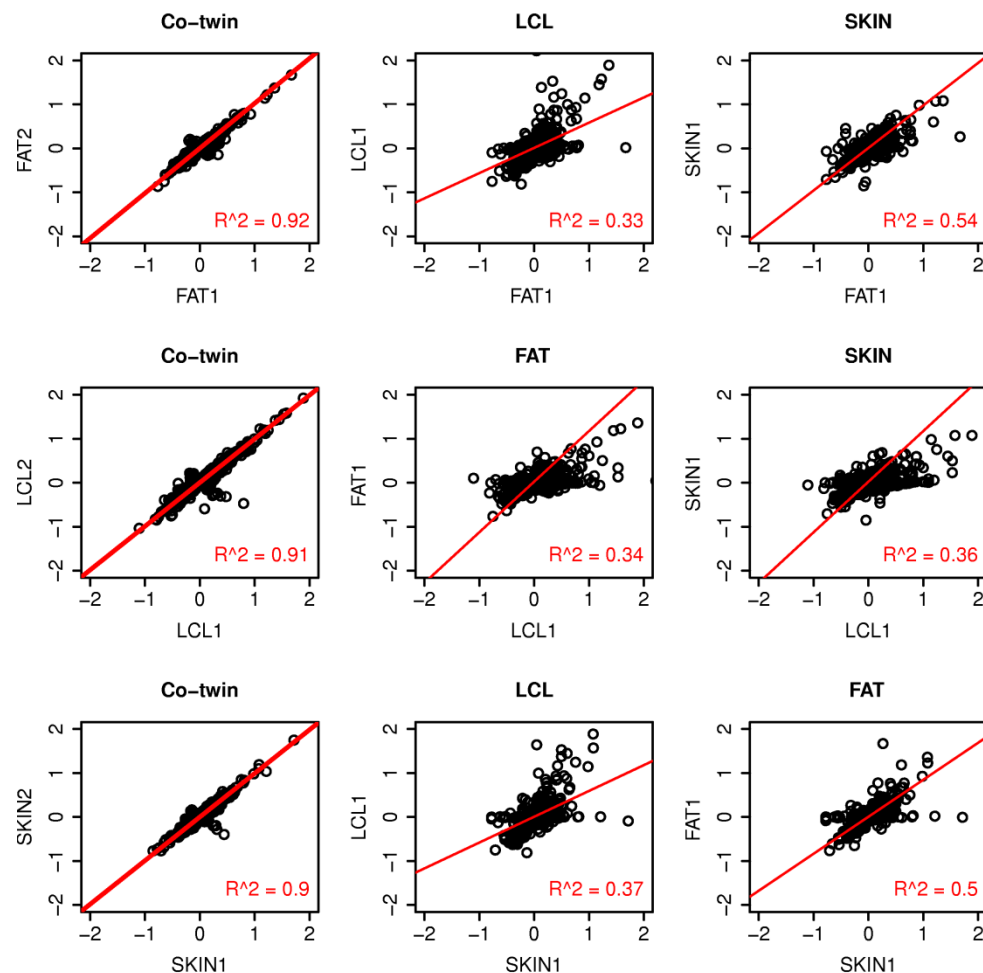

### Supplementary Fig. 9. RTC distribution

Histogram of RTC score distribution across adipose (*left*), LCL (*middle*) and skin (*right*) tissue for all tested hotspot intervals where *cis*-eQTLs (1% FDR) and GWA SNPs co-localize ( $N_{\text{adipose}} = 765$ ,  $N_{\text{LCL}} = 887$ ,  $N_{\text{skin}} = 639$ ). Under the null (regulatory polymorphisms cannot explain GWA SNPs of complex traits) we expect a uniform distribution of RTC scores. We observe an overrepresentation of high scores (RTC > 0.9) in all three tissues.

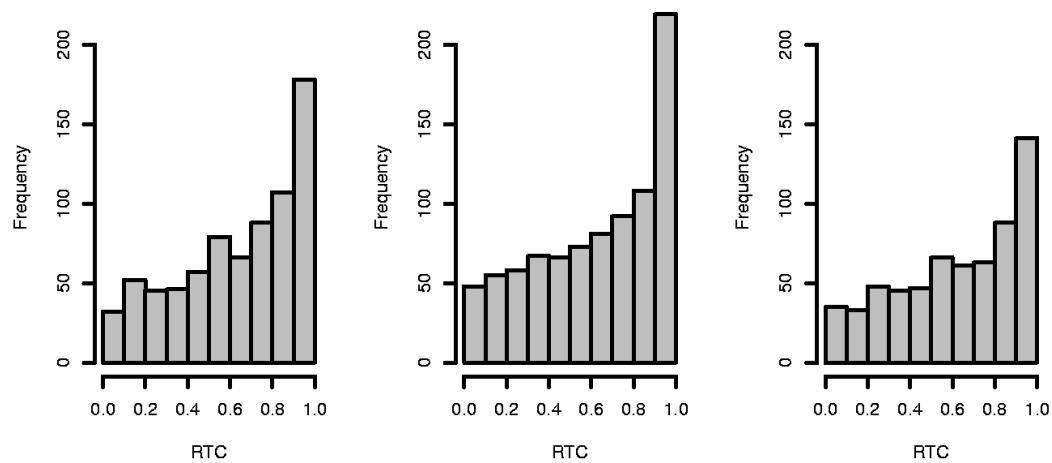

**Supplementary Fig 10. Multi-gene regulators of expression**

Distributions of  $\pi_1$  values for single-gene (*left panel*) and multi-gene regulators (*right panel*) across tissues. In each tissue, the median  $\pi_1$  of multi-gene regulators are greater than that for single-gene regulators, 0.20 vs. 0.11 in adipose, 0.26 vs. 0.14 in LCL and 0.23 vs. 0.12 in skin, respectively.

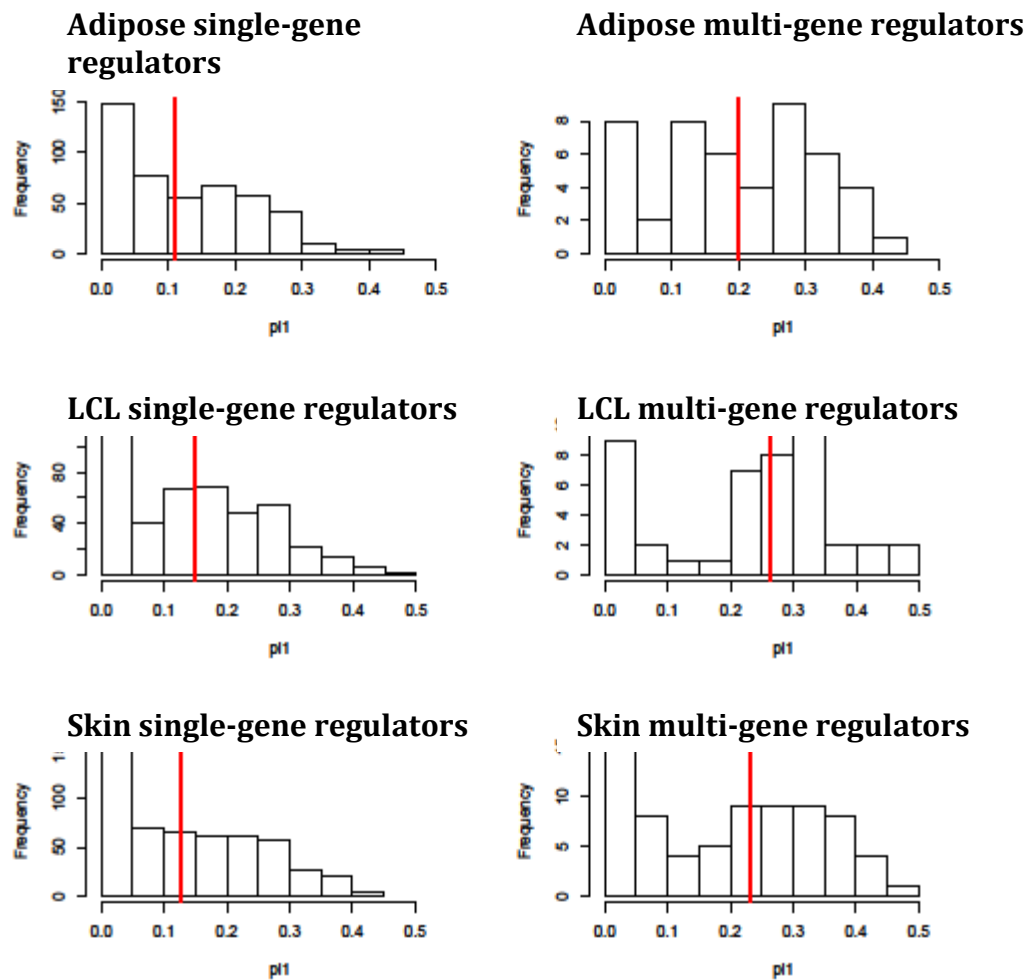

## Supplementary Tables

**Supplementary Table 1. MuTHER cohort characteristics**

|                           | N   | (MZ pairs/DZ pairs/singletons) |
|---------------------------|-----|--------------------------------|
| <b>Study participants</b> | 856 | 154/232/84                     |
| <b>Adipose biopsies</b>   | 855 | 153/232/85                     |
| <b>Skin biopsies</b>      | 847 | 153/225/91                     |
| <b>LCL</b>                | 837 | 143/227/97                     |

  

|                               | N   | Mean±SD (range)        |
|-------------------------------|-----|------------------------|
| <b>Age (years)</b>            | 856 | 59.4±9.0 (38.7-84.6)   |
| <b>Weight (kg)</b>            | 855 | 69.5±13.9 (37.4-134.1) |
| <b>Height (cm)</b>            | 856 | 161.4±5.9 (143-179.9)  |
| <b>BMI (kg/m<sup>2</sup>)</b> | 855 | 26.6±4.9 (16.2-47.1)   |

*Supplementary Table 2. MuTHER gene expression heritability estimates across tissues*

| <b>Tissue</b> | <b>All transcripts</b> | <b>All transcripts<br/>h<sup>2</sup>&gt;0.5 (%)</b> | <b>Expressed transcripts*</b> | <b>Expressed transcripts<br/>h<sup>2</sup>&gt;0.5 (%)</b> |
|---------------|------------------------|-----------------------------------------------------|-------------------------------|-----------------------------------------------------------|
| Adipose       | 23423                  | 1711 (7.3)                                          | 11394                         | 1550 (13.6)                                               |
| LCL           | 23428                  | 908 (3.9)                                           | 10631                         | 691 (6.5)                                                 |
| SKIN          | 23426                  | 1043 (4.4)                                          | 11932                         | 839 (7.0)                                                 |
| <b>Tissue</b> | <b>All transcripts</b> | <b>All transcripts<br/>h<sup>2</sup>&gt;0.4 (%)</b> | <b>Expressed transcripts*</b> | <b>Expressed transcripts<br/>h<sup>2</sup>&gt;0.4 (%)</b> |
| Adipose       | 23423                  | 3417 (14.6)                                         | 11394                         | 3009 (26.4)                                               |
| LCL           | 23428                  | 2155 (9.2)                                          | 10631                         | 1544 (14.5)                                               |
| SKIN          | 23426                  | 2073 (8.8)                                          | 11932                         | 1611 (13.5)                                               |
| <b>Tissue</b> | <b>All transcripts</b> | <b>All transcripts<br/>h<sup>2</sup>&gt;0.3 (%)</b> | <b>Expressed transcripts*</b> | <b>Expressed transcripts<br/>h<sup>2</sup>&gt;0.3 (%)</b> |
| Adipose       | 23423                  | 5714 (24.4)                                         | 11394                         | 4864 (42.7)                                               |
| LCL           | 23428                  | 4184 (17.8)                                         | 10631                         | 2987 (28.1)                                               |
| SKIN          | 23426                  | 3617 (15.4)                                         | 11932                         | 2690 (22.5)                                               |
| <b>Tissue</b> | <b>All transcripts</b> | <b>All transcripts<br/>h<sup>2</sup>&gt;0.2 (%)</b> | <b>Expressed transcripts*</b> | <b>Expressed transcripts<br/>h<sup>2</sup>&gt;0.2 (%)</b> |
| Adipose       | 23423                  | 7972 (34.0)                                         | 11394                         | 6695 (58.7)                                               |
| LCL           | 23428                  | 7054 (30.1)                                         | 10631                         | 5068 (47.7)                                               |
| SKIN          | 23426                  | 5461 (23.3)                                         | 11932                         | 4088 (34.3)                                               |
| <b>Tissue</b> | <b>All transcripts</b> | <b>All transcripts<br/>h<sup>2</sup>&gt;0.1 (%)</b> | <b>Expressed transcripts*</b> | <b>Expressed transcripts<br/>h<sup>2</sup>&gt;0.1 (%)</b> |
| Adipose       | 23423                  | 10027 (42.8)                                        | 11394                         | 8128 (71.3)                                               |
| LCL           | 23428                  | 10219 (43.6)                                        | 10631                         | 7200 (67.7)                                               |
| SKIN          | 23426                  | 7511 (32.1)                                         | 11932                         | 5574 (46.7)                                               |

\*defined according to the lumi algorithm were more than 10% of the arrays having a detected transcript (P<0.01)

**Supplementary Table 3. cis-eQTL mapping across multiple tissues**

| Significance level   | No. of cis-eQTLs (top SNP/transcript) |                 |                 | No. of cis-eQTLs (top SNP/expressed transcript) |                 |                 |
|----------------------|---------------------------------------|-----------------|-----------------|-------------------------------------------------|-----------------|-----------------|
|                      | ADIPOSE                               | LCL             | SKIN            | ADIPOSE                                         | LCL             | SKIN            |
| P<5x10 <sup>-8</sup> | 1738<br>(7.5%)                        | 2377<br>(10.3%) | 1341<br>(5.8%)  | 1511<br>(13.4%)                                 | 1987<br>(18.9%) | 1185<br>(10.0%) |
| 0.1% FDR             | 2469<br>(10.6%)                       | 3332<br>(14.4%) | 1932<br>(8.4%)  | 2195<br>(19.4%)                                 | 2710<br>(28.8%) | 1668<br>(14.1%) |
| 1% FDR               | 3523<br>(15.2%)                       | 4625<br>(20.0%) | 2796<br>(12.2%) | 3006<br>(26.6%)                                 | 3544<br>(33.7%) | 2314<br>(19.6%) |

**Supplementary Table 4. Characteristics of study cohorts for replication of cis and trans-associations**

| <b>Tissue</b>             | <b>Cohort</b>       | <b>N</b> | <b>Gender<br/>(Female%: Male%)</b> | <b>Age<br/>(mean±SD)</b>       | <b>Study<br/>population</b>   | <b>Microarray platform</b>  | <b>Replication</b>          |
|---------------------------|---------------------|----------|------------------------------------|--------------------------------|-------------------------------|-----------------------------|-----------------------------|
| Adipose<br>(subcutaneous) | Decode              | 585      | 60:40                              | 47.0±14.0                      | Healthy<br>donors             | Agilent Custom array        | <i>trans</i> only           |
| Adipose<br>(subcutaneous) | MGH                 | 701      | 75:25                              | 44.7±11.5                      | Gastric<br>bypass<br>patients | Agilent<br>Custom array     | <i>cis</i> and <i>trans</i> |
| LCL                       | ALSPAC              | 931      | 52:48                              | 7.0±0                          | Healthy<br>donors             | IlluminaHT12-V<br>BeadChips | <i>cis</i> and <i>trans</i> |
| LCL                       | Oxford<br>(TwinsUK) | 331      | 80:20                              | 53.8.0±13.1                    | Healthy<br>donors             | IlluminaWG6-<br>V2BeadChips | <i>cis</i> and <i>trans</i> |
| Skin<br>(fibroblasts)     | GenCORD             | 68       | 56:44                              | Umbilical cord<br>(38-41weeks) | Healthy<br>donors             | IlluminaWG6-<br>V3BeadChips | <i>cis</i> and <i>trans</i> |



**Supplementary Table 5. Highly heritable transcripts across tissues and the relative contribution of common cis-effects**

| Probe        | Chr | Gene     | $h^2_{\text{Adipose}}$ | $\text{cis-SNP}_{\text{Adipose}}$ | $\% h^2$ | $h^2_{\text{LCL}}$ | $\text{cis-SNP}_{\text{LCL}}$ | $\% h^2$ | $h^2_{\text{Skin}}$ | $\text{cis-SNP}_{\text{Skin}}$ | $\% h^2$ |
|--------------|-----|----------|------------------------|-----------------------------------|----------|--------------------|-------------------------------|----------|---------------------|--------------------------------|----------|
| ILMN_1659411 | 16  | POLR2C   | 0.79                   | rs17323082                        | 0.23     | 0.75               | rs17323082                    | 0.26     | 0.62                | rs17375948                     | 0.20     |
| ILMN_1663866 | 5   | TGFBI    | 0.78                   | rs17168967                        | 0.02     | 0.78               | rs11740868                    | 0.04     | 0.70                | rs2237066                      | 0.03     |
| ILMN_1664641 | 13  | MED4     | 0.73                   | rs2025864                         | 0.69     | 0.93               | rs1886977                     | 0.50     | 0.77                | rs2094190                      | 0.45     |
| ILMN_1665107 | 2   | ITGB1BP1 | 0.89                   | rs2715860                         | 0.03     | 0.86               | rs11887079                    | 0.03     | 0.63                | rs7589401                      | 0.07     |
| ILMN_1683279 | 6   | PEX6     | 0.74                   | rs2296804                         | 0.53     | 0.91               | rs2296804                     | 0.67     | 0.81                | rs2296804                      | 0.55     |
| ILMN_1719064 | 12  | KCTD10   | 0.88                   | rs4766601                         | 0.77     | 0.73               | rs4766601                     | 0.93     | 0.93                | rs4766601                      | 0.80     |
| ILMN_1723116 | 16  | AMFR     | 0.69                   | rs2432540                         | 0.74     | 0.78               | rs7205545                     | 0.47     | 0.79                | rs2432540                      | 0.49     |
| ILMN_1730054 | 22  | GSTT1    | 1.00                   | rs5760147                         | 0.47     | 1.00               | rs5760147                     | 0.44     | 1.00                | rs5760147                      | 0.55     |
| ILMN_1743145 | 5   | ERAP2    | 0.77                   | rs2910686                         | 0.91     | 0.83               | rs2910686                     | 0.88     | 0.64                | rs2910686                      | 1.00     |
| ILMN_1762255 | 1   | GSTM1    | 0.91                   | rs11101992                        | 0.17     | 1.00               | rs11101992                    | 0.14     | 0.98                | rs11101992                     | 0.16     |
| ILMN_1765332 | 11  | TIMM10   | 1.00                   | rs2511983                         | 0.58     | 0.72               | rs2511983                     | 0.57     | 1.00                | rs2729371                      | 0.57     |
| ILMN_1773313 | 10  | USMG5    | 1.00                   | rs7911488                         | 0.71     | 0.88               | rs7911488                     | 0.82     | 0.77                | rs12220267                     | 0.85     |
| ILMN_1778488 | 5   | WDR41    | 0.78                   | rs335628                          | 0.68     | 1.00               | rs441102                      | 0.55     | 0.78                | rs335628                       | 0.74     |
| ILMN_1784608 | 12  | CLEC2B   | 0.80                   | rs33872                           | 0.67     | 0.68               | rs33872                       | 0.50     | 1.00                | rs33872                        | 0.39     |
| ILMN_1798177 | 14  | CHURC1   | 0.89                   | rs7143432                         | 0.74     | 1.00               | rs4902345                     | 0.73     | 0.86                | rs4902345                      | 0.70     |
| ILMN_1807206 | 14  | DHRS1    | 0.65                   | rs2295307                         | 0.44     | 0.67               | rs4568                        | 0.18     | 0.61                | rs10136508                     | 0.06     |
| ILMN_1809147 | 22  | FAM118A  | 0.97                   | rs104664                          | 0.61     | 0.76               | rs104664                      | 0.94     | 0.84                | rs104664                       | 0.88     |
| ILMN_1810191 | 19  | PLA2G4C  | 0.97                   | rs1653554                         | 0.14     | 0.87               | rs274861                      | 0.26     | 1.00                | rs156645                       | 0.12     |
| ILMN_2112049 | 9   | DNLZ     | 0.64                   | rs8413                            | 0.08     | 0.87               | rs8413                        | 0.10     | 0.66                | rs11145922                     | 0.13     |
| ILMN_2115862 | 2   | ESPNL    | 0.72                   | rs12479385                        | 0.57     | 0.64               | rs2278742                     | 0.26     | 0.83                | rs12479385                     | 0.44     |
| ILMN_2134224 | 19  | ATP13A1  | 0.98                   | rs2304130                         | 0.55     | 1.00               | rs2304130                     | 0.57     | 0.67                | rs2304130                      | 0.71     |
| ILMN_2151579 | 21  | HMG1     | 0.72                   | rs2776311                         | 0.81     | 0.78               | rs2776311                     | 0.72     | 0.76                | rs2776311                      | 0.66     |
| ILMN_2173294 | 2   | FLJ10916 | 0.84                   | rs6547752                         | 0.62     | 0.80               | rs7581571                     | 0.26     | 0.63                | rs10865489                     | 0.87     |

**Supplementary Table 6. Integration of cis-eQTL (FDR 1%) with disease loci**

|                                 | <b>Tissue</b>    | <b>#Interval-Disease<br/>(RTC ≥ 0.9)</b> | <b>%<br/>Total</b> |
|---------------------------------|------------------|------------------------------------------|--------------------|
| <b>3 tissues</b>                | Adipose-LCL-Skin | 52                                       | 14.5               |
| <b>2 tissues only</b>           | Adipose-LCL      | 36                                       | 10.1               |
|                                 | Adipose-Skin     | 27                                       | 7.5                |
| <b>1 tissue only</b>            | LCL-Skin         | 26                                       | 7.3                |
|                                 | Adipose only     | 66                                       | 18.4               |
|                                 | LCL only         | 111                                      | 31                 |
| <b>Total RTC ≥ 0.9</b>          | Skin only        | 40                                       | 11.2               |
|                                 | Adipose          | 181                                      |                    |
|                                 | LCL              | 225                                      |                    |
|                                 | Skin             | 145                                      |                    |
| <b>Union of total RTC ≥ 0.9</b> |                  | 358                                      |                    |

**Supplementary Table 7. Candidate GWAS signals mediated through cis regulatory variants (RTC ≥ 0.9) in adipose, LCL and skin**

| GWAS SNP   | Trait                                            | eQTL       | Adipose p | LCL p     | SKIN p    | Gene     | RTC  |
|------------|--------------------------------------------------|------------|-----------|-----------|-----------|----------|------|
| rs11170631 | Height                                           | rs11170631 | 2.49E-40  | 6.68E-13  | 1.47E-27  | ATP5G2   | 1.00 |
| rs1172822  | Menarche and menopause (age at onset)            | rs1172822  | 3.55E-08  | 2.68E-05  | 0.1543    | BRSK1    | 1.00 |
| rs1878047  | Body mass index                                  | rs12975233 | 2.54E-06  | 0.5897    | 0.0729    | ETFB     | 1.00 |
| rs2074518  | QT interval                                      | rs1003918  | 1.92E-15  | 9.63E-28  | 2.61E-18  | LIG3     | 1.00 |
| rs2280401  | Hematological and biochemical traits             | rs2280401  | 2.92E-06  | 0.0074    | 0.9488    | FCGRT    | 1.00 |
| rs2304130  | Cholesterol, total;LDL cholesterol;Triglycerides | rs2304130  | 4.07E-86  | 3.38E-95  | 5.65E-71  | ATP13A1  | 1.00 |
| rs247616   | Cardiovascular disease risk factors              | rs3764261  | 4.50E-06  | 1.09E-07  | 0.1348    | CETP     | 1.00 |
| rs3018362  | Bone mineral density (hip);Pagets disease        | rs3018362  | 1.24E-10  | 2.17E-11  | 8.90E-09  | PIGN     | 1.00 |
| rs3129900  | Lumiracoxib-related liver injury                 | rs3129934  | 5.84E-09  | 0.0034    | 0.0053    | HSPA1B   | 1.00 |
| rs314370   | Resting heart rate                               | rs314370   | 2.59E-05  | 0.2867    | 0.0066    | ACHE     | 1.00 |
| rs3772130  | Cognitive performance                            | rs3772130  | 3.90E-12  | 4.42E-05  | 0.0004889 | IQCB1    | 1.00 |
| rs402710   | Lung cancer                                      | rs402710   | 2.19E-06  | 0.8848    | 0.0453    | CLPTM1L  | 1.00 |
| rs4077515  | Ulcerative colitis                               | rs10781496 | 2.68E-05  | 0.5494    | 0.0007273 | GPSM1    | 1.00 |
| rs439401   | Triglycerides                                    | rs439401   | 2.38E-09  | 0.2153    | 1.27E-10  | APOE     | 1.00 |
| rs4925386  | Colorectal cancer                                | rs4925386  | 1.94E-05  | 3.04E-11  | 1.14E-09  | OSBPL2   | 1.00 |
| rs531676   | Metabolic syndrome                               | rs531676   | 2.81E-13  | 0.8666    | 0.018     | CRTAC1   | 1.00 |
| rs619865   | Freckling                                        | rs619865   | 1.27E-05  | 0.0018    | 0.9087    | TP53INP2 | 1.00 |
| rs744166   | Crohns disease;Multiple sclerosis                | rs744166   | 9.07E-06  | 0.0008314 | 0.0037    | STAT3    | 1.00 |

|           |                                                                                       |            |          |           |          |          |      |
|-----------|---------------------------------------------------------------------------------------|------------|----------|-----------|----------|----------|------|
| rs7993214 | Psoriasis                                                                             | rs7993214  | 1.98E-05 | 0.3435    | 0.2107   | COG6     | 1.00 |
| rs8396    | Serum metabolites                                                                     | rs8396     | 4.06E-20 | 0.000381  | 4.42E-09 | ETFDH    | 1.00 |
| rs867186  | Plasma coagulation factors;Plasma levels of Protein C                                 | rs867186   | 3.24E-15 | 0.0909    | 1.01E-11 | PROCR    | 1.00 |
| rs886427  | Metabolic syndrome                                                                    | rs886427   | 3.38E-07 | 0.0002198 | 0.0277   | FLYWCH1  | 1.00 |
| rs900400  | Birth weight                                                                          | rs900400   | 6.75E-58 | 0.3332    | 0.0154   | TIPARP   | 1.00 |
| rs9469578 | Serum phosphorus concentrations                                                       | rs9469578  | 9.26E-06 | 0.8254    | 0.826    | ITPR3    | 1.00 |
| rs3134792 | Psoriasis                                                                             | rs2523567  | 5.53E-08 | 0.0075    | 4.42E-07 | HCP5     | 1.00 |
| rs1805007 | Blond vs. brown hair color;Freckles;Red vs non-red hair color;Skin sensitivity to sun | rs8049897  | 9.88E-12 | 0.0232    | 0.0023   | DBNDD1   | 1.00 |
| rs3806156 | Vitiligo                                                                              | rs3806156  | 3.43E-05 | 0.0009382 | 0.0035   | ATP6V1G2 | 1.00 |
| rs3761847 | Rheumatoid arthritis                                                                  | rs10818488 | 2.47E-10 | 0.0424    | 0.0088   | MEGF9    | 1.00 |
| rs910873  | Melanoma                                                                              | rs910873   | 3.57E-06 | 1.42E-05  | 0.0822   | EIF2S2   | 1.00 |
| rs2188962 | Crohns disease                                                                        | rs11242110 | 3.69E-05 | 5.82E-05  | 0.0413   | P4HA2    | 1.00 |
| rs2187668 | Celiac disease;Immunoglobulin A;Systemic lupus erythematosus                          | rs1794282  | 1.57E-08 | 3.81E-10  | 5.54E-09 | HLA-DPB1 | 0.99 |
| rs9630182 | Bone mineral density                                                                  | rs7125774  | 4.50E-06 | 0.5625    | 0.5663   | FAR1     | 0.99 |
| rs2338104 | HDL cholesterol                                                                       | rs918106   | 3.14E-06 | 6.68E-12  | 7.95E-05 | MMAB     | 0.99 |
| rs710865  | Brain structure                                                                       | rs709683   | 2.09E-05 | 2.52E-07  | 0.0011   | KIAA0090 | 0.99 |
| rs6495122 | Diastolic blood pressure                                                              | rs6495122  | 3.13E-05 | 0.9338    | 0.0166   | RPP25    | 0.99 |
| rs1003719 | Eye color traits                                                                      | rs1003721  | 9.77E-16 | 2.43E-06  | 1.45E-06 | TTC3     | 0.99 |
| rs3135388 | Multiple sclerosis                                                                    | rs7197     | 1.45E-07 | 0.0376    | 0.0105   | HSPA1B   | 0.99 |

|            |                                                 |            |          |           |           |          |      |
|------------|-------------------------------------------------|------------|----------|-----------|-----------|----------|------|
| rs9461688  | Protein quantitative trait loci                 | rs9263871  | 4.74E-27 | 0.0071    | 3.23E-14  | HCG27    | 0.99 |
| rs9491696  | Waist-hip ratio                                 | rs7766106  | 9.90E-13 | 0.2352    | 0.6477    | RSPO3    | 0.99 |
| rs2517713  | Nasopharyngeal carcinoma                        | rs2735096  | 2.10E-16 | 1.49E-20  | 8.73E-08  | HCG4     | 0.99 |
| rs3117582  | Lung adenocarcinoma;Lung cancer                 | rs3117582  | 3.19E-05 | 0.4935    | 4.87E-06  | HCP5     | 0.99 |
| rs2856683  | Primary biliary cirrhosis                       | rs9275293  | 4.22E-05 | 0.0026    | 0.0011    | DOM3Z    | 0.99 |
| rs10786284 | Attention deficit hyperactivity disorder        | rs11188739 | 8.91E-07 | 0.2829    | 0.5401    | SORBS1   | 0.99 |
| rs757978   | Chronic lymphocytic leukemia                    | rs7601738  | 1.72E-21 | 1.46E-06  | 1.93E-14  | 2-Sep    | 0.99 |
| rs4810485  | Rheumatoid arthritis                            | rs4810485  | 1.11E-07 | 0.5036    | 7.52E-05  | CD40     | 0.99 |
| rs2647044  | Type 1 diabetes                                 | rs1794282  | 1.57E-08 | 3.81E-10  | 5.54E-09  | HLA-DPB1 | 0.99 |
| rs29232    | Nasopharyngeal carcinoma                        | rs909728   | 4.78E-06 | 4.73E-12  | 4.00E-05  | NA       | 0.99 |
| rs2858884  | Narcolepsy                                      | rs9276401  | 4.69E-05 | 0.0915    | 0.1098    | NOTCH4   | 0.99 |
| rs9268480  | Ulcerative colitis                              | rs3806156  | 3.43E-05 | 0.0009382 | 0.0035    | ATP6V1G2 | 0.99 |
| rs2251746  | Serum IgE levels                                | rs7540542  | 4.19E-05 | 0.0269    | 0.0003813 | FCER1A   | 0.99 |
| rs4771122  | Body mass index                                 | rs7334690  | 8.49E-06 | 9.06E-06  | 2.41E-07  | POLR1D   | 0.99 |
| rs13146355 | Serum magnesium levels                          | rs17253722 | 7.32E-06 | 0.1277    | 0.0423    | SHRM     | 0.98 |
| rs2647044  | Type 1 diabetes                                 | rs3129843  | 3.41E-06 | 0.3835    | 3.14E-05  | HCP5     | 0.98 |
| rs2070600  | Pulmonary function                              | rs805284   | 4.51E-06 | 0.0007175 | 0.0002779 | VAR2     | 0.98 |
| rs429608   | Age-related macular degeneration                | rs8192585  | 7.60E-06 | 0.0782    | 0.0005009 | HLA-DOB  | 0.98 |
| rs9253     | Hemostatic factors and hematological phenotypes | rs12119795 | 1.34E-06 | 6.73E-14  | 0.0019    | C1orf149 | 0.98 |
| rs2524054  | CD4:CD8 lymphocyte ratio                        | rs9264594  | 2.49E-05 | 0.7253    | 0.6545    | CLIC1    | 0.98 |

|            |                                                              |            |          |          |          |          |      |
|------------|--------------------------------------------------------------|------------|----------|----------|----------|----------|------|
| rs2151145  | Menopause (age at onset)                                     | rs4387054  | 8.65E-07 | 0.0015   | 0.0038   | TLE4     | 0.98 |
| rs433598   | Schizophrenia                                                | rs163269   | 1.14E-05 | 0.8378   | 0.3364   | ACSM5    | 0.98 |
| rs3134792  | Psoriasis                                                    | rs2905710  | 2.71E-06 | 0.1878   | 2.20E-15 | MICB     | 0.98 |
| rs12198173 | HIV-1 control                                                | rs12153855 | 4.68E-05 | 0.0189   | 0.0396   | LSM2     | 0.98 |
| rs6435862  | Neuroblastoma (high-risk)                                    | rs6715570  | 2.73E-21 | 1.03E-13 | 8.14E-16 | BARD1    | 0.98 |
| rs2187668  | Celiac disease;Immunoglobulin A;Systemic lupus erythematosus | rs3129843  | 3.41E-06 | 0.3835   | 3.14E-05 | HCP5     | 0.98 |
| rs798544   | Height                                                       | rs798565   | 1.33E-08 | 1.15E-54 | 6.68E-06 | GNA12    | 0.98 |
| rs1158867  | Plasma levels of Protein C                                   | rs7599210  | 5.55E-12 | 0.1024   | 0.0054   | ERCC3    | 0.98 |
| rs3763313  | HIV-1 control                                                | rs13209234 | 8.11E-08 | 4.95E-16 | 1.86E-05 | TAP2     | 0.98 |
| rs4077515  | Ulcerative colitis                                           | rs10870077 | 4.05E-05 | 0.2212   | 0.074    | NA       | 0.98 |
| rs3099844  | Neonatal lupus                                               | rs2734583  | 1.23E-06 | 0.1989   | 2.86E-09 | HCP5     | 0.98 |
| rs4924935  | Pancreatic cancer                                            | rs966811   | 7.72E-06 | 0.4859   | 0.3295   | PRPSAP2  | 0.98 |
| rs8170     | Breast cancer;Ovarian cancer                                 | rs12982178 | 4.61E-07 | 0.9879   | 0.9464   | OCEL1    | 0.98 |
| rs3131296  | Schizophrenia                                                | rs1150752  | 7.09E-06 | 8.05E-07 | 1.12E-06 | HLA-DPB1 | 0.98 |
| rs3131379  | Systemic lupus erythematosus                                 | rs1150755  | 3.60E-06 | 0.2065   | 3.20E-12 | MICB     | 0.98 |
| rs1799810  | Self-rated health                                            | rs7599210  | 5.55E-12 | 0.1024   | 0.0054   | ERCC3    | 0.98 |
| rs17007017 | Conduct disorder (case status)                               | rs9637655  | 2.20E-05 | 9.86E-05 | 7.59E-06 | ZNF330   | 0.98 |
| rs227584   | Bone mineral density (hip)                                   | rs2040810  | 1.75E-08 | 7.79E-09 | 0.3843   | C17orf53 | 0.98 |
| rs9271366  | Immunoglobulin A;Multiple sclerosis                          | rs7197     | 1.45E-07 | 0.0376   | 0.0105   | HSPA1B   | 0.98 |

|            |                                                                                                                                                   |            |          |          |           |          |      |
|------------|---------------------------------------------------------------------------------------------------------------------------------------------------|------------|----------|----------|-----------|----------|------|
| rs1678542  | Rheumatoid arthritis                                                                                                                              | rs1078109  | 5.83E-08 | 0.0432   | 0.0042    | TMEM194  | 0.98 |
| rs3131379  | Systemic lupus erythematosus                                                                                                                      | rs1150752  | 7.09E-06 | 8.05E-07 | 1.12E-06  | HLA-DPB1 | 0.98 |
| rs1376877  | Subclinical atherosclerosis traits (other)                                                                                                        | rs3731695  | 8.75E-06 | 0.0371   | 5.42E-05  | ALS2CR16 | 0.97 |
| rs131794   | Mean corpuscular volume                                                                                                                           | rs131816   | 1.63E-10 | 1.13E-18 | 3.38E-07  | ECGF1    | 0.97 |
| rs7703051  | LDL cholesterol                                                                                                                                   | rs17671591 | 4.79E-05 | 0.8454   | 0.792     | C5orf37  | 0.97 |
| rs10263639 | Breast cancer                                                                                                                                     | rs2215137  | 1.51E-06 | 0.0152   | 0.0361    | STAG3L4  | 0.97 |
| rs429608   | Age-related macular degeneration                                                                                                                  | rs609061   | 9.68E-08 | 9.55E-05 | 0.0001315 | RDBP     | 0.97 |
| rs494620   | Menopause (age at onset)                                                                                                                          | rs660550   | 6.88E-14 | 0.0011   | 1.15E-06  | HSPA1B   | 0.97 |
| rs3129934  | Multiple sclerosis                                                                                                                                | rs3129934  | 5.84E-09 | 0.0034   | 0.0053    | HSPA1B   | 0.97 |
| rs10903129 | Cholesterol, total                                                                                                                                | rs3091242  | 1.83E-07 | 6.88E-17 | 1.63E-07  | TMEM50A  | 0.97 |
| rs11622475 | Bipolar disorder                                                                                                                                  | rs1187448  | 3.64E-09 | 2.44E-07 | 0.0098    | TDRD9    | 0.97 |
| rs10876432 | Bone mineral density (spine)                                                                                                                      | rs10082776 | 4.49E-05 | 0.7534   | 0.1732    | TENC1    | 0.97 |
| rs17319721 | Chronic kidney disease;Renal function and chronic kidney disease                                                                                  | rs17253722 | 7.32E-06 | 0.1277   | 0.0423    | SHRM     | 0.97 |
| rs10484561 | Follicular lymphoma                                                                                                                               | rs13209234 | 8.11E-08 | 4.95E-16 | 1.86E-05  | TAP2     | 0.97 |
| rs3099844  | Neonatal lupus                                                                                                                                    | rs9267445  | 9.08E-08 | 0.0699   | 0.0003818 | NOTCH4   | 0.97 |
| rs258322   | Black vs. red hair color;Melanoma                                                                                                                 | rs8049897  | 9.88E-12 | 0.0232   | 0.0023    | DBNDD1   | 0.97 |
| rs3764261  | Age-related macular degeneration;Blood lipid traits;HDL cholesterol;LDL cholesterol;Metabolic syndrome;Waist circumference and related phenotypes | rs3764261  | 4.50E-06 | 1.09E-07 | 0.1348    | CETP     | 0.97 |
| rs4911414  | Burning and freckling;Freckles;Red vs. non-red hair                                                                                               | rs11700255 | 3.84E-07 | 0.4134   | 0.0729    | ITCH     | 0.97 |

|            |                                      |            |          |           |           |          |      |
|------------|--------------------------------------|------------|----------|-----------|-----------|----------|------|
|            | color;Skin sensitivity to sun        |            |          |           |           |          |      |
| rs3134792  | Psoriasis                            | rs2248902  | 4.06E-09 | 0.4869    | 1.57E-05  | NOTCH4   | 0.97 |
| rs494620   | Menopause (age at onset)             | rs592229   | 3.51E-05 | 0.5091    | 0.1914    | AGPAT1   | 0.97 |
| rs12696304 | Telomere length                      | rs9822885  | 4.80E-05 | 0.2755    | 0.5244    | ARPM1    | 0.97 |
| rs13437082 | Height                               | rs2844580  | 2.03E-05 | 0.1133    | 0.3427    | FLOT1    | 0.97 |
| rs7758512  | HIV-1 control                        | rs9258278  | 1.80E-05 | NA        | NA        | HCG18    | 0.97 |
| rs10109414 | Chronic kidney disease               | rs17786744 | 4.68E-05 | 0.646     | 0.0725    | SLC25A37 | 0.97 |
| rs229541   | Type 1 diabetes                      | rs229562   | 1.53E-07 | 0.1317    | 0.0392    | C1QTNF6  | 0.96 |
| rs7209435  | Height                               | rs12325866 | 1.47E-10 | 9.14E-05  | 0.000266  | DDX42    | 0.96 |
| rs629301   | Blood lipid traits                   | rs611917   | 6.57E-06 | 1.33E-07  | 0.0001637 | GSTM1    | 0.96 |
| rs4794822  | Neutrophil count                     | rs3859192  | 9.50E-27 | 0.8402    | 1.19E-07  | GSDMA    | 0.96 |
| rs2244621  | Longevity                            | rs3751120  | 1.90E-14 | 0.9732    | 0.5771    | VEGFB    | 0.96 |
| rs2524054  | CD4:CD8 lymphocyte ratio             | rs2243868  | 3.92E-05 | 0.0404    | 0.0002639 | SKIV2L   | 0.96 |
| rs660895   | Rheumatoid arthritis                 | rs9275207  | 1.55E-13 | 3.17E-07  | 1.15E-13  | HLA-DOB  | 0.96 |
| rs884205   | Bone mineral density (spine)         | rs3018362  | 1.24E-10 | 2.17E-11  | 8.90E-09  | PIGN     | 0.96 |
| rs167769   | Eosinophilic esophagitis (pediatric) | rs2122694  | 2.67E-06 | 0.1937    | 0.0125    | RBMS2    | 0.96 |
| rs9859260  | Mean corpuscular volume              | rs11185506 | 2.22E-07 | 0.0005284 | 4.16E-05  | MUC20    | 0.96 |
| rs17145713 | Plasma levels of Protein C           | rs11974409 | 4.59E-16 | 0.9503    | 4.51E-23  | MLXIPL   | 0.96 |
| rs2571445  | Pulmonary function                   | rs1035673  | 3.59E-10 | 0.6935    | 0.0959    | TNS1     | 0.96 |
| rs7932354  | Bone mineral density (hip)           | rs10769205 | 6.16E-13 | 0.6249    | 4.45E-05  | ARHGAP1  | 0.96 |



|            |                                               |            |          |          |           |          |      |
|------------|-----------------------------------------------|------------|----------|----------|-----------|----------|------|
| rs4785763  | Melanoma                                      | rs6500462  | 5.25E-06 | 1.41E-21 | 9.69E-05  | CDK10    | 0.96 |
| rs4130590  | Bipolar disorder                              | rs3808839  | 1.61E-09 | 4.49E-15 | 0.0391    | SLC2A8   | 0.96 |
| rs2188962  | Crohns disease                                | rs2248116  | 7.42E-07 | 7.75E-08 | 0.0002889 | RAD50    | 0.96 |
| rs6088792  | Height                                        | rs17421899 | 2.17E-05 | 0.0022   | 0.6868    | TP53INP2 | 0.95 |
| rs7197475  | Systemic lupus erythematosus                  | rs9934806  | 2.33E-06 | 0.0014   | 0.0002222 | ZNF689   | 0.95 |
| rs7197475  | Systemic lupus erythematosus                  | rs4889603  | 1.32E-08 | 0.0064   | 0.0082    | MYST1    | 0.95 |
| rs10838738 | Body mass index                               | rs17788930 | 1.27E-11 | 1.69E-05 | 1.95E-07  | C1QTNF4  | 0.95 |
| rs11683229 | Protein quantitative trait loci               | rs4671052  | 1.01E-05 | 0.1984   | 0.2145    | EHBP1    | 0.95 |
| rs1678542  | Rheumatoid arthritis                          | rs2306390  | 1.21E-05 | 0.1576   | 0.0258    | TSPAN31  | 0.95 |
| rs703842   | Multiple sclerosis                            | rs11172343 | 1.21E-44 | 3.20E-44 | 3.42E-21  | FAM119B  | 0.95 |
| rs2523608  | HIV-1 control                                 | rs9266596  | 1.31E-05 | 0.0031   | 0.161     | ABCF1    | 0.95 |
| rs174550   | Fasting glucose-related traits                | rs174578   | 1.14E-05 | 0.0134   | 0.2072    | FADS1    | 0.95 |
| rs3733829  | Smoking behavior                              | rs2305797  | 1.91E-35 | 2.82E-38 | 8.28E-19  | RAB4B    | 0.95 |
| rs2524054  | CD4:CD8 lymphocyte ratio                      | rs9263938  | 1.73E-08 | 0.0023   | 4.38E-09  | VAR52    | 0.95 |
| rs6495122  | Diastolic blood pressure                      | rs11630918 | 2.18E-06 | 0.0106   | 0.37      | SNUPN    | 0.95 |
| rs10507380 | Electrocardiographic traits                   | rs9507868  | 1.72E-12 | 0.3083   | 3.31E-05  | RASL11A  | 0.95 |
| rs1980493  | Anti-cyclic Citrullinated Peptide Antibody    | rs1794282  | 1.57E-08 | 3.81E-10 | 5.54E-09  | HLA-DPB1 | 0.95 |
| rs2856683  | Primary biliary cirrhosis                     | rs9275207  | 1.55E-13 | 3.17E-07 | 1.15E-13  | HLA-DOB  | 0.95 |
| rs1900004  | Optic disc parameters;Vertical cup-disc ratio | rs10823171 | 4.41E-28 | 1.45E-27 | 3.98E-11  | SLC25A16 | 0.95 |
| rs9468925  | Vitiligo                                      | rs9263871  | 4.74E-27 | 0.0071   | 3.23E-14  | HCG27    | 0.95 |

|            |                                                             |            |          |           |           |          |      |
|------------|-------------------------------------------------------------|------------|----------|-----------|-----------|----------|------|
| rs6861681  | Waist-hip ratio                                             | rs7736263  | 2.49E-26 | 1.76E-39  | 5.48E-21  | CPEB4    | 0.95 |
| rs6060369  | Height                                                      | rs224320   | 2.41E-07 | 0.9721    | 7.26E-05  | PROCR    | 0.94 |
| rs6532197  | Parkinsons disease                                          | rs10516849 | 3.19E-11 | 0.5679    | 1.01E-05  | MMRN1    | 0.94 |
| rs9264942  | HIV-1 control                                               | rs2905710  | 2.71E-06 | 0.1878    | 2.20E-15  | MICB     | 0.94 |
| rs2072590  | Ovarian cancer                                              | rs1318778  | 5.01E-06 | 0.1405    | 0.002     | HOXD3    | 0.94 |
| rs4072037  | Esophageal cancer and gastric cancer;Serum magnesium levels | rs4971088  | 1.46E-10 | 5.06E-12  | 0.0001261 | ADAM15   | 0.94 |
| rs947211   | Parkinsons disease                                          | rs708726   | 1.14E-05 | 3.88E-07  | 4.85E-05  | RAB7L1   | 0.94 |
| rs9268480  | Ulcerative colitis                                          | rs2856705  | 4.24E-05 | 0.0276    | 0.6376    | SYNGAP1  | 0.94 |
| rs6074022  | Multiple sclerosis                                          | rs4810485  | 1.11E-07 | 0.5036    | 7.52E-05  | CD40     | 0.94 |
| rs1728785  | Ulcerative colitis                                          | rs6499186  | 3.05E-11 | 1.52E-27  | 0.0062    | ZFP90    | 0.94 |
| rs216345   | Bipolar disorder                                            | rs13287325 | 1.19E-17 | 4.51E-17  | 1.41E-12  | NUDT2    | 0.94 |
| rs12928822 | Celiac disease                                              | rs7187741  | 5.74E-14 | 3.30E-36  | 0.0273    | C16orf75 | 0.94 |
| rs2277027  | Pulmonary function                                          | rs6899205  | 2.00E-09 | 2.68E-05  | 3.08E-09  | ADAM19   | 0.94 |
| rs9461688  | Protein quantitative trait loci                             | rs2243868  | 3.92E-05 | 0.0404    | 0.0002639 | SKIV2L   | 0.94 |
| rs477515   | Inflammatory bowel disease                                  | rs3806156  | 3.43E-05 | 0.0009382 | 0.0035    | ATP6V1G2 | 0.94 |
| rs3131379  | Systemic lupus erythematosus                                | rs3132941  | 1.59E-05 | 0.3725    | 1.77E-05  | HCP5     | 0.94 |
| rs13385191 | Prostate cancer                                             | rs12622106 | 5.10E-36 | 2.89E-49  | 4.44E-23  | C2orf43  | 0.94 |
| rs13192471 | Rheumatoid arthritis                                        | rs13209234 | 8.11E-08 | 4.95E-16  | 1.86E-05  | TAP2     | 0.94 |
| rs9271100  | Systemic lupus erythematosus                                | rs7197     | 1.45E-07 | 0.0376    | 0.0105    | HSPA1B   | 0.94 |

|            |                                                                    |            |          |           |           |          |      |
|------------|--------------------------------------------------------------------|------------|----------|-----------|-----------|----------|------|
| rs9469220  | Crohns disease                                                     | rs9275207  | 1.55E-13 | 3.17E-07  | 1.15E-13  | HLA-DOB  | 0.94 |
| rs958672   | Aging traits                                                       | rs13015501 | 1.11E-06 | 0.8395    | 0.0002282 | GALNT13  | 0.94 |
| rs470119   | Hematological and biochemical traits                               | rs131816   | 1.63E-10 | 1.13E-18  | 3.38E-07  | ECGF1    | 0.94 |
| rs2239557  | Common traits (Other)                                              | rs4899502  | 1.42E-14 | 1.04E-17  | 1.26E-16  | LIN52    | 0.94 |
| rs2736428  | Telomere length                                                    | rs660550   | 6.88E-14 | 0.0011    | 1.15E-06  | HSPA1B   | 0.93 |
| rs2839619  | Biochemical measures                                               | rs4920023  | 6.53E-07 | 0.0004251 | 0.0869    | WDR4     | 0.93 |
| rs3846663  | Quantitative traits                                                | rs17671591 | 4.79E-05 | 0.8454    | 0.792     | C5orf37  | 0.93 |
| rs429608   | Age-related macular degeneration                                   | rs4151671  | 1.24E-19 | 2.72E-31  | 1.23E-07  | DOM3Z    | 0.93 |
| rs3094212  | Hematological and biochemical traits                               | rs3131003  | 4.74E-05 | 4.19E-05  | 0.0115    | ATP6V1G2 | 0.93 |
| rs7188697  | QT interval                                                        | rs9926577  | 8.46E-06 | 3.97E-07  | 2.02E-06  | CNOT1    | 0.93 |
| rs2856683  | Primary biliary cirrhosis                                          | rs3806156  | 3.43E-05 | 0.0009382 | 0.0035    | ATP6V1G2 | 0.93 |
| rs26232    | Rheumatoid arthritis                                               | rs421946   | 1.86E-07 | 6.94E-07  | 0.6621    | C5orf30  | 0.93 |
| rs2524054  | CD4:CD8 lymphocyte ratio                                           | rs3997982  | 3.12E-05 | 0.4235    | 0.7358    | C2       | 0.93 |
| rs2301436  | Crohns disease                                                     | rs9457249  | 4.34E-05 | 2.73E-07  | 0.0012    | FGFR10P  | 0.93 |
| rs11648785 | Tanning                                                            | rs7498985  | 6.80E-16 | 0.0966    | 0.0086    | GAS8     | 0.93 |
| rs12740374 | LDL cholesterol                                                    | rs611917   | 6.57E-06 | 1.33E-07  | 0.0001637 | GSTM1    | 0.93 |
| rs694739   | Alopecia areata                                                    | rs600377   | 5.01E-07 | 1.33E-32  | 2.80E-15  | CCDC88B  | 0.93 |
| rs185819   | Height                                                             | rs592229   | 3.51E-05 | 0.5091    | 0.1914    | AGPAT1   | 0.93 |
| rs174547   | HDL cholesterol;Resting heart rate;Serum metabolites;Triglycerides | rs174578   | 1.14E-05 | 0.0134    | 0.2072    | FADS1    | 0.93 |

|            |                                         |            |          |          |           |          |      |
|------------|-----------------------------------------|------------|----------|----------|-----------|----------|------|
| rs6498169  | Multiple sclerosis                      | rs794433   | 4.92E-06 | 0.1856   | 0.0176    | C16orf75 | 0.93 |
| rs2856683  | Primary biliary cirrhosis               | rs2856705  | 4.24E-05 | 0.0276   | 0.6376    | SYNGAP1  | 0.92 |
| rs3807989  | Electrocardiographic traits;PR interval | rs1049337  | 2.65E-64 | 6.31E-17 | 1.55E-53  | CAV1     | 0.92 |
| rs1512268  | Prostate cancer                         | rs11774063 | 3.23E-07 | 0.0107   | 4.44E-13  | SLC25A37 | 0.92 |
| rs16889440 | Radiation response                      | rs12523750 | 4.23E-09 | 3.16E-09 | 0.0002975 | MRS2     | 0.92 |
| rs9468925  | Vitiligo                                | rs2243868  | 3.92E-05 | 0.0404   | 0.0002639 | SKIV2L   | 0.92 |
| rs6904029  | Vitiligo                                | rs2735096  | 2.10E-16 | 1.49E-20 | 8.73E-08  | HCG4     | 0.92 |
| rs167769   | Eosinophilic esophagitis (pediatric)    | rs841718   | 4.55E-62 | 1.36E-53 | 5.14E-50  | STAT6    | 0.92 |
| rs4744712  | Chronic kidney disease                  | rs12006032 | 2.93E-05 | 0.5268   | 0.1343    | PRKACG   | 0.92 |
| rs2040704  | Serum IgE levels                        | rs17772583 | 1.19E-25 | 1.83E-35 | 3.93E-11  | RAD50    | 0.92 |
| rs3131296  | Schizophrenia                           | rs3132941  | 1.59E-05 | 0.3725   | 1.77E-05  | HCP5     | 0.92 |
| rs1178979  | Triglycerides                           | rs11974409 | 4.59E-16 | 0.9503   | 4.51E-23  | MLXIPL   | 0.92 |
| rs1805081  | Obesity                                 | rs11663558 | 2.56E-17 | 3.97E-08 | 4.62E-15  | NPC1     | 0.92 |
| rs3764021  | Type 1 diabetes                         | rs2268146  | 1.88E-19 | 0.3119   | 1.49E-22  | CLECL1   | 0.92 |
| rs7120118  | HDL cholesterol                         | rs4752973  | 1.51E-05 | 3.42E-05 | 0.1981    | NR1H3    | 0.92 |
| rs3806156  | Vitiligo                                | rs2856705  | 4.24E-05 | 0.0276   | 0.6376    | SYNGAP1  | 0.92 |
| rs3761218  | Bipolar disorder                        | rs4815603  | 7.86E-13 | 0.316    | 0.2766    | CDC25B   | 0.92 |
| rs4324798  | Lung adenocarcinoma                     | rs7745768  | 4.42E-07 | 4.65E-05 | 0.0009734 | HCG2P7   | 0.92 |
| rs9468925  | Vitiligo                                | rs9264594  | 2.49E-05 | 0.7253   | 0.6545    | CLIC1    | 0.92 |
| rs3131296  | Schizophrenia                           | rs1150755  | 3.60E-06 | 0.2065   | 3.20E-12  | MICB     | 0.92 |

|            |                                                                                   |            |          |          |           |         |      |
|------------|-----------------------------------------------------------------------------------|------------|----------|----------|-----------|---------|------|
| rs2839619  | Biochemical measures                                                              | rs11700748 | 1.60E-20 | 4.11E-40 | 8.20E-50  | CBS     | 0.92 |
| rs4925386  | Colorectal cancer                                                                 | rs6143035  | 2.87E-08 | 0.0058   | 7.57E-09  | CABLES2 | 0.91 |
| rs11931074 | Parkinsons disease                                                                | rs3857059  | 1.09E-07 | 0.0326   | 1.28E-05  | MMRN1   | 0.91 |
| rs2075671  | Other erythrocyte phenotypes                                                      | rs4727459  | 1.38E-05 | 1.13E-06 | 0.000244  | GIGYF1  | 0.91 |
| rs3129882  | Parkinsons disease                                                                | rs7197     | 1.45E-07 | 0.0376   | 0.0105    | HSPA1B  | 0.91 |
| rs229527   | Vitiligo                                                                          | rs229562   | 1.53E-07 | 0.1317   | 0.0392    | C1QTNF6 | 0.91 |
| rs13160562 | Alcohol dependence                                                                | rs17401719 | 4.11E-09 | 1.32E-26 | 0.0012    | ERAP1   | 0.91 |
| rs157580   | Alzheimers disease;HDL cholesterol;LDL cholesterol                                | rs439401   | 2.38E-09 | 0.2153   | 1.27E-10  | APOE    | 0.91 |
| rs1390401  | Height                                                                            | rs6664307  | 1.28E-20 | 1.63E-14 | 1.52E-10  | JMJD4   | 0.91 |
| rs5751614  | Height                                                                            | rs140503   | 9.45E-39 | 1.71E-21 | 2.79E-38  | BCR     | 0.91 |
| rs646776   | Cholesterol, total;Myocardial infarction (early onset);Response to statin therapy | rs611917   | 6.57E-06 | 1.33E-07 | 0.0001637 | GSTM1   | 0.91 |
| rs3129055  | Nasopharyngeal carcinoma                                                          | rs441808   | 3.48E-14 | 4.27E-15 | 2.81E-14  | HCG2P7  | 0.91 |
| rs16826658 | Endometriosis                                                                     | rs2744721  | 3.53E-06 | 0.2057   | 0.0434    | CDC42   | 0.91 |
| rs401681   | Bladder cancer;Pancreatic cancer                                                  | rs402710   | 2.19E-06 | 0.8848   | 0.0453    | CLPTM1L | 0.91 |
| rs643531   | HDL cholesterol                                                                   | rs4237138  | 1.41E-05 | 0.0149   | 0.4615    | TTC39B  | 0.91 |
| rs798766   | Bladder cancer;Urinary bladder cancer                                             | rs744658   | 3.17E-09 | 0.7619   | 0.8843    | FGFR3   | 0.91 |
| rs2524054  | CD4:CD8 lymphocyte ratio                                                          | rs9263871  | 4.74E-27 | 0.0071   | 3.23E-14  | HCG27   | 0.91 |
| rs1986734  | Eosinophilic esophagitis (pediatric)                                              | rs17253722 | 7.32E-06 | 0.1277   | 0.0423    | SHRM    | 0.91 |
| rs2523608  | HIV-1 control                                                                     | rs9266329  | 2.55E-05 | 0.1815   | 0.1177    | DOM3Z   | 0.91 |

|            |                                             |            |          |           |           |         |      |
|------------|---------------------------------------------|------------|----------|-----------|-----------|---------|------|
| rs6465657  | Prostate cancer                             | rs7804318  | 4.59E-06 | 0.3877    | 1.43E-09  | TECPR1  | 0.91 |
| rs2736428  | Telomere length                             | rs805284   | 4.51E-06 | 0.0007175 | 0.0002779 | VAR2    | 0.91 |
| rs6504340  | Primary tooth development (number of teeth) | rs1042815  | 2.05E-09 | 3.02E-21  | 9.80E-19  | HOXB2   | 0.90 |
| rs7931342  | Prostate cancer                             | rs11825796 | 2.42E-06 | 0.0063    | 0.0087    | MYEOV   | 0.90 |
| rs3894194  | Asthma                                      | rs4247366  | 4.33E-05 | 0.5858    | 0.8229    | KRT24   | 0.90 |
| rs4794822  | Neutrophil count                            | rs3213762  | 1.51E-05 | 0.1099    | 0.1498    | PGAP3   | 0.90 |
| rs7743761  | Ankylosing spondylitis                      | rs2844580  | 2.03E-05 | 0.1133    | 0.3427    | FLOT1   | 0.90 |
| rs11648785 | Tanning                                     | rs6500462  | 5.25E-06 | 1.41E-21  | 9.69E-05  | CDK10   | 0.90 |
| rs2076529  | Waist-hip ratio                             | rs2856705  | 4.24E-05 | 0.0276    | 0.6376    | SYNGAP1 | 0.90 |
| rs660895   | Rheumatoid arthritis                        | rs9275293  | 4.22E-05 | 0.0026    | 0.0011    | DOM3Z   | 0.90 |
| rs29232    | Nasopharyngeal carcinoma                    | rs9258278  | 1.80E-05 | NA        | NA        | HCG18   | 0.90 |
| rs11150610 | Systemic lupus erythematosus                | rs1106398  | 2.85E-06 | 0.0887    | 0.4559    | MYST1   | 0.90 |
| rs748404   | Lung cancer                                 | rs12912744 | 1.94E-05 | 0.3207    | 0.2189    | SERF2   | 0.90 |
| rs1678542  | Rheumatoid arthritis                        | rs1148555  | 5.18E-07 | 0.0741    | 0.0447    | DDIT3   | 0.90 |
| rs1980493  | Anti-cyclic Citrullinated Peptide Antibody  | rs3129843  | 3.41E-06 | 0.3835    | 3.14E-05  | HCP5    | 0.90 |
| rs11647936 | Waist circumference                         | rs8053334  | 5.08E-31 | 1.43E-23  | 2.89E-18  | KLHL36  | 0.90 |

**Supplementary Table 8. trans-eQTL mapping across multiple tissues**

|             | No. of trans-associations at<br>$P < 5 \times 10^{-8}$ |     |      |
|-------------|--------------------------------------------------------|-----|------|
|             | ADIPOSE                                                | LCL | SKIN |
| Trans-eQTLs | 639                                                    | 557 | 609  |
| Transcripts | 595                                                    | 509 | 609  |
| SNPs        | 518                                                    | 491 | 493  |

**Supplementary Table 9. Median genome-wide  $\pi_1$  values for trans-SNPs in each tissue.**

| Tissue of Discovery | Trans-SNP type        | N   | Adipose median $\pi_1$ | LCL median $\pi_1$ | Skin median $\pi_1$ |
|---------------------|-----------------------|-----|------------------------|--------------------|---------------------|
| Adipose             | Multi-gene regulator  | 48  | <b>0.2</b>             | 0.03               | 0.02                |
| Adipose             | Single-gene regulator | 470 | <b>0.11</b>            | 0.02               | 0.01                |
| LCL                 | Multi-gene regulator  | 48  | 0                      | <b>0.26</b>        | 0.004               |
| LCL                 | Single-gene regulator | 443 | 0.004                  | <b>0.15</b>        | 0.02                |
| Skin                | Multi-gene regulator  | 44  | 0.002                  | 0.01               | <b>0.29</b>         |
| Skin                | Single-gene regulator | 449 | 0                      | 0                  | <b>0.15</b>         |

**Supplementary Table 10. Replicated trans-associations in independent study cohorts**

| <i>Adipose trans-replication</i> |          |     |            |     |            |      |    | <i>MuTHER</i> |         | <i>DeCODE</i> |         | <i>MGH</i> |         |
|----------------------------------|----------|-----|------------|-----|------------|------|----|---------------|---------|---------------|---------|------------|---------|
| PROBE                            | Gene     | Chr | SNP        | Chr | Coordinate | Freq | A1 | beta          | p       | beta          | p       | direction  | p       |
| ILMN_1652166                     | GUCY1B2  | 13  | rs12142688 | 1   | 49114640   | 0.19 | T  | 0.05          | 3.0E-08 | -0.009        | 2.6E-01 | +          | 2.4E-02 |
| ILMN_1722059                     | SAFB     | 19  | rs7515865  | 1   | 169648370  | 0.65 | G  | 0.07          | 2.8E-08 | 0.004         | 1.8E-01 | +          | 3.5E-02 |
| ILMN_1753241                     | SNTA1    | 20  | rs6542665  | 2   | 3984589    | 0.44 | T  | 0.07          | 3.2E-08 | 0.007         | 4.0E-02 | +          | 3.3E-01 |
| ILMN_1756417                     | ANKRD37  | 4   | rs162561   | 2   | 38152381   | 0.21 | T  | -0.08         | 2.4E-09 | -0.012        | 5.0E-02 | -          | 4.3E-01 |
| ILMN_1685574                     | TSC22D2  | 3   | rs10209934 | 2   | 52116454   | 0.33 | T  | -0.13         | 6.3E-09 | 0.006         | 3.5E-01 | -          | 5.4E-03 |
| ILMN_2137464                     | DVL3     | 3   | rs7595947  | 2   | 52117836   | 0.67 | G  | 0.10          | 4.9E-08 | 0.000         | 8.5E-01 | +          | 1.6E-02 |
| ILMN_2363058                     | PAOX     | 10  | rs9309438  | 2   | 70696282   | 0.33 | T  | 0.08          | 2.6E-08 | 0.008         | 3.3E-02 | NA         | NA      |
| ILMN_1679754                     | ADRA1B   | 5   | rs6746736  | 2   | 207260638  | 0.06 | G  | 0.20          | 3.0E-10 | -0.003        | 5.6E-01 | +          | 4.8E-02 |
| ILMN_1802804                     | L3MBTL   | 20  | rs12994785 | 2   | 212565670  | 0.46 | G  | -0.03         | 3.6E-08 | -0.011        | 5.5E-03 | +          | 2.6E-01 |
| ILMN_1754660                     | ZCCHC24  | 10  | rs1499258  | 3   | 1552232    | 0.68 | T  | -0.10         | 5.0E-09 | 0.000         | 9.5E-01 | -          | 2.0E-02 |
| ILMN_1723678                     | PRPH     | 12  | rs4279078  | 3   | 12289846   | 0.88 | G  | -0.11         | 5.0E-08 | 0.004         | 3.7E-01 | -          | 4.4E-02 |
| ILMN_1731299                     | PML      | 15  | rs4679614  | 3   | 59785907   | 0.82 | T  | 0.05          | 2.6E-08 | 0.002         | 6.1E-01 | +          | 4.2E-02 |
| ILMN_1768575                     | SFTPD    | 10  | rs13065597 | 3   | 157384630  | 0.83 | T  | -0.17         | 2.9E-08 | -0.031        | 2.7E-02 | -          | 6.0E-01 |
| ILMN_1674811                     | OASL     | 12  | rs3864096  | 3   | 188419970  | 0.92 | T  | -0.18         | 4.0E-09 | -0.021        | 1.6E-02 | +          | 9.0E-01 |
| ILMN_1765299                     | PRIMA1   | 14  | rs1447281  | 4   | 5274561    | 0.51 | G  | 0.03          | 4.1E-08 | 0.004         | 2.8E-02 | +          | 9.8E-01 |
| ILMN_2304577                     | KCNK7    | 11  | rs6822971  | 4   | 148907089  | 0.06 | T  | 0.16          | 2.4E-10 | 0.018         | 3.9E-02 | +          | 2.5E-01 |
| ILMN_1761275                     | FUT6     | 19  | rs2962954  | 5   | 18458951   | 0.13 | G  | -0.05         | 1.9E-08 | 0.003         | 5.4E-01 | -          | 1.6E-02 |
| ILMN_1793151                     | OR2T4    | 1   | rs2548098  | 5   | 98949414   | 0.37 | G  | -0.03         | 4.0E-08 | NA            | NA      | -          | 4.1E-02 |
| ILMN_1760635                     | RAD51C   | 17  | rs543363   | 6   | 131492805  | 0.20 | T  | -0.08         | 2.9E-08 | -0.005        | 3.8E-01 | -          | 2.2E-02 |
| ILMN_1655924                     | TRNT1    | 3   | rs783182   | 6   | 161088538  | 0.50 | G  | 0.06          | 3.8E-09 | 0.007         | 1.3E-01 | +          | 4.0E-02 |
| ILMN_1740185                     | TPMT     | 6   | rs13234269 | 7   | 130079726  | 0.52 | T  | 0.11          | 2.2E-15 | 0.000         | 9.9E-01 | +          | 7.0E-04 |
| ILMN_1760320                     | GNB1     | 1   | rs13234269 | 7   | 130079726  | 0.52 | T  | 0.05          | 1.8E-08 | 0.010         | 8.0E-04 | +          | 1.3E-04 |
| ILMN_1675038                     | PRMT2    | 21  | rs4731702  | 7   | 130083924  | 0.48 | T  | -0.06         | 6.9E-09 | -0.013        | 8.0E-03 | +          | 2.5E-01 |
| ILMN_1693862                     | MGC70857 | 8   | rs4731702  | 7   | 130083924  | 0.48 | T  | -0.09         | 4.8E-10 | -0.013        | 3.3E-06 | NA         | NA      |
| ILMN_1731745                     | NINJ2    | 12  | rs11979110 | 7   | 130086999  | 0.48 | T  | -0.08         | 8.2E-09 | -0.009        | 5.0E-02 | -          | 3.6E-01 |
| ILMN_1746948                     | MYL5     | 4   | rs13233731 | 7   | 130088229  | 0.52 | G  | 0.09          | 4.4E-08 | 0.013         | 2.0E-03 | +          | 2.5E-04 |
| ILMN_1681087                     | SLC7A10  | 19  | rs738134   | 7   | 130118115  | 0.32 | G  | -0.32         | 2.0E-10 | -0.047        | 4.0E-03 | -          | 2.0E-09 |
| ILMN_1784737                     | S1PR4    | 19  | rs11778621 | 8   | 118434473  | 0.94 | T  | -0.11         | 3.9E-08 | -0.024        | 2.6E-02 | NA         | NA      |
| ILMN_2149494                     | NPL      | 1   | rs12546735 | 8   | 141453121  | 0.29 | T  | 0.13          | 4.5E-08 | -0.018        | 1.4E-01 | +          | 4.2E-02 |
| ILMN_2407703                     | SYN1     | 23  | rs1173106  | 9   | 92485434   | 0.08 | T  | 0.06          | 3.5E-08 | 0.012         | 6.8E-03 | NA         | NA      |
| ILMN_1773764                     | CECR7    | 22  | rs10740803 | 10  | 29790196   | 0.35 | T  | 0.21          | 4.9E-21 | 0.001         | 8.3E-01 | +          | 4.4E-05 |
| ILMN_2308903                     | WFDC3    | 20  | rs4979805  | 10  | 79678480   | 0.06 | G  | 0.10          | 4.8E-09 | 0.027         | 3.1E-02 | +          | 7.7E-01 |
| ILMN_2220735                     | CLEC3A   | 16  | rs4090286  | 11  | 7601115    | 0.86 | G  | 0.06          | 1.9E-10 | 0.006         | 2.2E-02 | +          | 4.6E-01 |



|                              |             |            |            |            |                   |             |           |               |          |               |          |                       |          |
|------------------------------|-------------|------------|------------|------------|-------------------|-------------|-----------|---------------|----------|---------------|----------|-----------------------|----------|
| ILMN_1682227                 | ZNF404      | 19         | rs509082   | 11         | 29375423          | 0.28        | T         | 0.03          | 1.5E-08  | NA            | NA       | +                     | 2.3E-02  |
| ILMN_1774334                 | HIGD2A      | 5          | rs2200745  | 12         | 10065581          | 0.66        | G         | -0.08         | 3.1E-08  | 0.003         | 3.0E-01  | -                     | 4.2E-02  |
| ILMN_1798612                 | SNX20       | 16         | rs4763192  | 12         | 61392975          | 0.91        | G         | -0.05         | 3.2E-08  | -0.011        | 1.9E-02  | +                     | 5.5E-01  |
| ILMN_1683939                 | VIPR2       | 7          | rs4942485  | 13         | 31851182          | 0.13        | G         | -0.06         | 4.8E-08  | 0.005         | 7.4E-01  | -                     | 5.7E-03  |
| ILMN_2310296                 | C21orf58    | 21         | rs9573847  | 13         | 75836476          | 0.13        | G         | 0.10          | 7.3E-09  | 0.005         | 4.8E-01  | +                     | 4.5E-02  |
| ILMN_2093343                 | PLAC8       | 4          | rs7338833  | 13         | 82926073          | 0.13        | G         | 0.07          | 1.8E-08  | 0.024         | 1.9E-02  | -                     | 5.6E-01  |
| ILMN_1736103                 | ITPR2       | 12         | rs1956368  | 14         | 59174889          | 0.78        | T         | -0.11         | 2.9E-09  | -0.021        | 2.3E-02  | NA                    | NA       |
| ILMN_1749071                 | CNIH3       | 1          | rs347932   | 15         | 30972071          | 0.26        | G         | 0.04          | 4.0E-09  | 0.024         | 8.8E-03  | -                     | 4.7E-01  |
| ILMN_1698996                 | SLC19A1     | 21         | rs11073955 | 15         | 83471793          | 0.58        | G         | -0.06         | 2.2E-08  | -0.018        | 5.1E-03  | +                     | 8.0E-01  |
| ILMN_2340886                 | OTOF        | 2          | rs4796460  | 17         | 6131231           | 0.36        | T         | 0.03          | 1.8E-08  | -0.003        | 1.7E-01  | +                     | 4.3E-02  |
| ILMN_1694801                 | SLC39A4     | 8          | rs6046153  | 20         | 19443671          | 0.28        | T         | 0.03          | 1.5E-08  | 0.004         | 4.9E-02  | +                     | 2.2E-01  |
| ILMN_1718907                 | TSHZ1       | 18         | rs399355   | 20         | 31113764          | 0.27        | T         | 0.09          | 2.0E-08  | 0.001         | 8.0E-01  | +                     | 6.7E-03  |
| ILMN_1705813                 | CFTR        | 7          | rs9977233  | 21         | 37869312          | 0.31        | G         | 0.04          | 1.4E-08  | 0.002         | 7.3E-01  | +                     | 6.9E-03  |
| ILMN_1735432                 | ISCU        | 12         | rs3842987  | 21         | 42022606          | 0.43        | C         | 0.07          | 4.4E-09  | -0.001        | 7.0E-01  | +                     | 1.4E-03  |
| ILMN_2136423                 | MARS2       | 2          | rs9621258  | 22         | 30174270          | 0.94        | G         | -0.06         | 4.4E-08  | -0.022        | 3.2E-02  | +                     | 4.1E-01  |
| ILMN_2404256                 | PTPRT       | 20         | rs9625970  | 22         | 42714835          | 0.93        | T         | -0.06         | 6.6E-09  | 0.013         | 1.1E-02  | -                     | 4.8E-04  |
| <i>LCL trans-replication</i> |             |            |            |            |                   |             |           | <i>MuTHER</i> |          | <i>ALSPAC</i> |          | <i>Oxford-TwinsUK</i> |          |
| <b>PROBE</b>                 | <b>Gene</b> | <b>Chr</b> | <b>SNP</b> | <b>Chr</b> | <b>Coordinate</b> | <b>Freq</b> | <b>A1</b> | <b>beta</b>   | <b>p</b> | <b>beta</b>   | <b>p</b> | <b>beta</b>           | <b>p</b> |
| ILMN_1751045                 | C20orf86    | 20         | rs6740340  | 2          | 25550937          | 0.471       | T         | -0.04         | 6.0E-09  | 0.00          | 6.8E-01  | -0.07                 | 3.0E-02  |
| ILMN_1674519                 | ZP2         | 16         | rs11884490 | 2          | 152964016         | 0.05        | G         | 0.11          | 3.2E-08  | 0.08          | 4.5E-02  | NA                    | NA       |
| ILMN_1716421                 | ADRA1D      | 20         | rs6738805  | 2          | 230791415         | 0.844       | T         | 0.12          | 1.9E-21  | 0.02          | 2.4E-02  | -0.01                 | 6.2E-01  |
| ILMN_1766169                 | BCAT1       | 12         | rs9989746  | 2          | 230824034         | 0.824       | G         | -0.20         | 5.0E-08  | -0.01         | 6.7E-01  | -0.23                 | 6.1E-04  |
| ILMN_1773389                 | PLTP        | 20         | rs9835138  | 3          | 119371969         | 0.745       | C         | 0.12          | 3.0E-08  | 0.05          | 2.6E-02  | -0.02                 | 7.0E-01  |
| ILMN_1811443                 | AVP         | 20         | rs1250090  | 4          | 1203697           | 0.133       | T         | 0.19          | 2.4E-22  | 0.11          | 6.7E-09  | 0.17                  | 6.9E-03  |
| ILMN_2406439                 | SPTBN4      | 19         | rs900019   | 4          | 1212836           | 0.867       | C         | -0.12         | 9.3E-19  | -0.05         | 2.9E-05  | NA                    | NA       |
| ILMN_1654370                 | TESK2       | 1          | rs1552061  | 4          | 5777297           | 0.148       | T         | -0.12         | 3.7E-08  | 0.04          | 4.2E-02  | -0.18                 | 2.9E-02  |
| ILMN_1751776                 | CKAP2L      | 2          | rs12500996 | 4          | 38281006          | 0.769       | G         | 0.09          | 3.7E-09  | 0.02          | 3.2E-01  | 0.08                  | 3.1E-02  |
| ILMN_1712088                 | CLYBL       | 13         | rs6820936  | 4          | 177351883         | 0.331       | T         | -0.10         | 2.4E-08  | 0.04          | 2.0E-02  | -0.16                 | 2.4E-02  |
| ILMN_1796179                 | HIST1H2BK   | 6          | rs7714390  | 5          | 157117358         | 0.202       | G         | 0.22          | 8.0E-09  | NA            | NA       | 0.30                  | 8.6E-06  |
| ILMN_1732071                 | HIST2H2BE   | 1          | rs7714390  | 5          | 157117358         | 0.202       | G         | 0.07          | 3.2E-08  | NA            | NA       | 0.30                  | 6.9E-05  |
| ILMN_1724669                 | RUNX1T1     | 8          | rs278016   | 5          | 166951589         | 0.693       | G         | -0.03         | 4.3E-08  | -0.01         | 2.8E-02  | 0.05                  | 1.6E-01  |
| ILMN_1728810                 | NDUFS1      | 2          | rs3823342  | 6          | 30021046          | 0.508       | T         | -0.17         | 3.8E-55  | -0.09         | 9.9E-19  | 0.08                  | 7.9E-02  |
| ILMN_2354237                 | PARP2       | 14         | rs2844511  | 6          | 31497763          | 0.497       | G         | -0.09         | 1.6E-13  | -0.05         | 2.0E-05  | NA                    | NA       |
| ILMN_1759948                 | RNF5P1      | 8          | rs3132965  | 6          | 32254975          | 0.216       | G         | -0.17         | 7.6E-20  | -0.20         | 1.3E-20  | NA                    | NA       |
| ILMN_1768301                 | ERG         | 21         | rs7194     | 6          | 32520458          | 0.387       | G         | 0.15          | 5.4E-50  | 0.10          | 4.1E-21  | 0.00                  | 9.3E-01  |
| ILMN_1675387                 | LIMS1       | 2          | rs9269491  | 6          | 32650822          | 0.726       | C         | 0.15          | 2.8E-14  | NA            | NA       | 0.35                  | 3.0E-13  |

|                               |             |            |            |            |                   |             |           |               |          |                |          |       |         |
|-------------------------------|-------------|------------|------------|------------|-------------------|-------------|-----------|---------------|----------|----------------|----------|-------|---------|
| ILMN_2099586                  | CCDC28B     | 1          | rs9275141  | 6          | 32759095          | 0.512       | T         | 0.13          | 4.8E-09  | 0.05           | 1.4E-03  | NA    | NA      |
| ILMN_2307721                  | IL22RA2     | 6          | rs7789197  | 7          | 40931652          | 0.829       | G         | -0.08         | 3.3E-08  | -0.03          | 3.6E-02  | NA    | NA      |
| ILMN_2071446                  | PI15        | 8          | rs6593296  | 7          | 56085787          | 0.261       | T         | 0.05          | 5.5E-11  | 0.04           | 1.8E-05  | NA    | NA      |
| ILMN_1783709                  | RRAGA       | 9          | rs2003499  | 7          | 98852920          | 0.896       | T         | 0.09          | 1.9E-11  | 0.08           | 2.2E-04  | 0.05  | 1.1E-01 |
| ILMN_1677877                  | UBE2L3      | 22         | rs9643283  | 8          | 133185236         | 0.589       | G         | -0.08         | 2.5E-09  | -0.04          | 2.3E-02  | 0.04  | 1.8E-01 |
| ILMN_2186078                  | MCART2      | 18         | rs3750551  | 9          | 71051949          | 0.893       | G         | 0.04          | 3.4E-08  | 0.02           | 5.0E-02  | NA    | NA      |
| ILMN_1700031                  | PRAME       | 22         | rs7865017  | 9          | 132760043         | 0.066       | T         | 0.12          | 9.6E-11  | 0.01           | 6.6E-01  | 0.16  | 2.7E-02 |
| ILMN_1773764                  | CECR7       | 22         | rs2182400  | 10         | 29747557          | 0.23        | G         | 0.14          | 6.0E-20  | 0.09           | 2.3E-07  | 0.36  | 1.4E-13 |
| ILMN_1780840                  | C2orf16     | 2          | rs12280580 | 11         | 616220            | 0.286       | G         | -0.04         | 1.2E-08  | -0.01          | 4.1E-01  | -0.13 | 5.4E-03 |
| ILMN_1794505                  | SHFM1       | 7          | rs7479101  | 11         | 792115            | 0.674       | G         | -0.09         | 1.7E-11  | -0.13          | 7.9E-18  | -0.11 | 5.7E-04 |
| ILMN_1714412                  | ZNF292      | 6          | rs10902222 | 11         | 800882            | 0.681       | T         | -0.09         | 7.2E-10  | -0.05          | 4.1E-08  | -0.08 | 7.5E-02 |
| ILMN_1758895                  | CTSK        | 1          | rs10833455 | 11         | 21056463          | 0.567       | G         | -0.06         | 4.1E-08  | -0.02          | 4.2E-02  | 0.10  | 1.6E-01 |
| ILMN_1657950                  | RPS26P10    | 8          | rs1873914  | 12         | 54665694          | 0.589       | G         | -0.21         | 8.4E-38  | -0.26          | 9.1E-115 | -0.66 | 1.2E-16 |
| ILMN_1740094                  | BEND4       | 4          | rs10876864 | 12         | 54687352          | 0.411       | G         | 0.11          | 5.1E-26  | 0.18           | 1.5E-111 | 0.09  | 4.2E-02 |
| ILMN_1749375                  | TNFAIP8     | 5          | rs11110954 | 12         | 100593825         | 0.289       | G         | 0.07          | 4.3E-08  | 0.01           | 6.4E-01  | 0.08  | 4.3E-02 |
| ILMN_1785037                  | SSR2        | 1          | rs1961056  | 12         | 126176948         | 0.699       | T         | 0.08          | 2.7E-08  | 0.03           | 1.3E-02  | 0.02  | 4.8E-01 |
| ILMN_1753008                  | REXO1       | 19         | rs10507407 | 13         | 32960738          | 0.964       | G         | -0.15         | 2.2E-08  | -0.15          | 1.4E-04  | NA    | NA      |
| ILMN_1790625                  | CBX3        | 7          | rs2444302  | 15         | 38565798          | 0.444       | G         | -0.07         | 4.4E-09  | -0.05          | 1.6E-03  | -0.02 | 5.9E-01 |
| ILMN_1804945                  | ZNF667      | 19         | rs220377   | 16         | 3288172           | 0.764       | G         | 0.06          | 2.9E-08  | 0.04           | 3.3E-01  | 0.15  | 4.7E-03 |
| ILMN_1791039                  | RTF1        | 15         | rs8081803  | 17         | 2511759           | 0.742       | T         | 0.07          | 2.4E-09  | 0.06           | 6.7E-11  | NA    | NA      |
| ILMN_1674646                  | IRF7        | 11         | rs17159840 | 19         | 7664194           | 0.239       | T         | -0.07         | 4.8E-08  | -0.06          | 4.3E-06  | -0.02 | 5.8E-01 |
| ILMN_1802557                  | HEBP1       | 12         | rs12462505 | 19         | 42829965          | 0.203       | G         | 0.10          | 2.2E-08  | 0.05           | 3.0E-04  | 0.16  | 3.5E-02 |
| ILMN_1784352                  | CCM2        | 7          | rs651601   | 19         | 44618665          | 0.666       | T         | -0.14         | 7.6E-24  | -0.15          | 1.2E-14  | -0.17 | 1.1E-15 |
| ILMN_1732467                  | OR2AG1      | 11         | rs2186317  | 21         | 33515444          | 0.462       | G         | 0.08          | 4.2E-31  | 0.02           | 1.1E-06  | 0.18  | 7.6E-07 |
| ILMN_1666169                  | NBR2        | 17         | rs2836991  | 21         | 39656593          | 0.914       | G         | 0.11          | 1.2E-12  | 0.03           | 3.1E-02  | NA    | NA      |
| ILMN_1803300                  | C14orf68    | 14         | rs455941   | 22         | 21586260          | 0.768       | T         | -0.10         | 2.2E-21  | -0.01          | 1.9E-01  | -0.60 | 3.1E-14 |
| ILMN_1721818                  | CLDN10      | 13         | rs9608573  | 22         | 25794157          | 0.083       | T         | 0.13          | 9.9E-09  | 0.05           | 1.6E-03  | 0.37  | 3.2E-03 |
| ILMN_1685194                  | CLDN10      | 13         | rs2074735  | 22         | 29865872          | 0.934       | G         | -0.12         | 2.3E-11  | -0.01          | 7.1E-01  | -0.31 | 4.6E-02 |
| ILMN_1697710                  | IL1F7       | 2          | rs4821843  | 22         | 37670583          | 0.805       | G         | 0.11          | 1.6E-08  | 0.09           | 1.9E-11  | -0.07 | 5.0E-01 |
| <i>Skin trans-replication</i> |             |            |            |            |                   |             |           | <i>MuTHER</i> |          | <i>GenCORD</i> |          | -     |         |
| <b>PROBE</b>                  | <b>Gene</b> | <b>Chr</b> | <b>SNP</b> | <b>Chr</b> | <b>Coordinate</b> | <b>Freq</b> | <b>A1</b> | <b>beta</b>   | <b>p</b> | <b>rho</b>     | <b>p</b> |       |         |
| ILMN_1780236                  | PMM1        | 22         | rs4652519  | 1          | 178815787         | 0.68        | G         | -0.08         | 2.5E-09  | -0.38          | 1.4E-03  |       |         |
| ILMN_1773925                  | BCL2L14     | 12         | rs1545181  | 2          | 81781849          | 0.79        | G         | -0.04         | 3.1E-08  | -0.27          | 2.6E-02  |       |         |
| ILMN_1664543                  | IFIT3       | 10         | rs1579904  | 3          | 74773407          | 0.95        | T         | -0.08         | 6.6E-09  | -0.26          | 3.2E-02  |       |         |
| ILMN_1815951                  | PCYOX1L     | 5          | rs17054719 | 4          | 170239098         | 0.08        | G         | 0.06          | 4.1E-08  | 0.28           | 2.0E-02  |       |         |
| ILMN_1737164                  | TM9SF1      | 14         | rs10944587 | 6          | 93102151          | 0.63        | G         | 0.07          | 4.9E-08  | 0.27           | 2.3E-02  |       |         |

|              |          |    |            |    |           |      |   |       |         |       |         |  |  |
|--------------|----------|----|------------|----|-----------|------|---|-------|---------|-------|---------|--|--|
| ILMN_2383455 | SUOX     | 12 | rs9403102  | 6  | 140031856 | 0.07 | T | -0.14 | 3.0E-08 | -0.25 | 4.0E-02 |  |  |
| ILMN_1792435 | STAG1    | 3  | rs7823289  | 8  | 102669784 | 0.41 | T | -0.06 | 3.9E-08 | -0.27 | 2.7E-02 |  |  |
| ILMN_1811029 | TLK1     | 2  | rs10979525 | 9  | 110619957 | 0.10 | T | 0.17  | 1.6E-08 | 0.27  | 2.6E-02 |  |  |
| ILMN_2232166 | CCDC90B  | 11 | rs11012618 | 10 | 18417101  | 0.08 | C | -0.23 | 1.1E-08 | -0.26 | 3.3E-02 |  |  |
| ILMN_1719286 | CTSA     | 20 | rs947913   | 11 | 123028053 | 0.92 | G | -0.15 | 1.1E-08 | -0.33 | 5.6E-03 |  |  |
| ILMN_2375786 | LECT1    | 13 | rs1215608  | 12 | 105045459 | 0.54 | T | -0.05 | 4.2E-08 | -0.29 | 1.7E-02 |  |  |
| ILMN_1657955 | FMNL3    | 12 | rs872273   | 13 | 22573103  | 0.06 | G | 0.08  | 2.2E-09 | 0.26  | 3.1E-02 |  |  |
| ILMN_2103362 | ARHGAP27 | 17 | rs1539177  | 13 | 46198056  | 0.43 | G | -0.05 | 3.6E-08 | -0.24 | 4.9E-02 |  |  |
| ILMN_2125880 | ZNF566   | 19 | rs8022497  | 14 | 86603364  | 0.93 | G | -0.10 | 1.0E-08 | -0.30 | 1.4E-02 |  |  |
| ILMN_1791346 | ATF3     | 1  | rs1158689  | 16 | 13779188  | 0.19 | G | 0.04  | 1.1E-08 | 0.24  | 4.7E-02 |  |  |

## Supplementary Note

### ***MuTHER (Multiple Tissue Human Expression Resource) Consortium Membership***

Kourosh R. Ahmadi<sup>1</sup>, Chrysanthi Ainali<sup>2</sup>, Amy Barrett<sup>3</sup>, Veronique Bataille<sup>1</sup>, Jordana T. Bell<sup>1</sup>, Alfonso Buil<sup>5</sup>, Panos Deloukas<sup>6</sup>, Emmanouil T. Dermitzakis<sup>5</sup>, Antigone S. Dimas<sup>4,5</sup>, Richard Durbin<sup>6</sup>, Daniel Glass<sup>1</sup>, Elin Grundberg<sup>1,6</sup>, Neelam Hassanali<sup>3</sup>, Åsa K. Hedman<sup>4</sup>, Catherine Ingle<sup>6</sup>, David Knowles<sup>7</sup>, Maria Krestyaninova<sup>8</sup>, Cecilia M. Lindgren<sup>4</sup>, Christopher E. Lowe<sup>9,10</sup>, Mark I. McCarthy<sup>3,4,11</sup>, Eshwar Meduri<sup>1,6</sup>, Paola di Meglio<sup>12</sup>, Josine L. Min<sup>4</sup>, Stephen B. Montgomery<sup>5</sup>, Frank O. Nestle<sup>12</sup>, Alexandra C. Nica<sup>5</sup>, James Nisbet<sup>6</sup>, Stephen O'Rahilly<sup>9,10</sup>, Leopold Parts<sup>6</sup>, Simon Potter<sup>6</sup>, Magdalena Sekowska<sup>6</sup>, So-Youn Shin<sup>6</sup>, Kerrin S. Small<sup>1,6</sup>, Nicole Soranzo<sup>6</sup>, Tim D. Spector<sup>1</sup>, Gabriela Surdulescu<sup>1</sup>, Mary E. Travers<sup>3</sup>, Loukia Tsaprouni<sup>6</sup>, Sophia Tsoka<sup>2</sup>, Alicja Wilk<sup>6</sup>, Tsun-Po Yang<sup>6</sup>, Krina T. Zondervan<sup>4</sup>

1. Department of Twin Research and Genetic Epidemiology, King's College London, London, UK
2. Department of Informatics, School of Natural and Mathematical Sciences, King's College London, Strand, London WC2R 2LS.
3. Oxford Centre for Diabetes, Endocrinology & Metabolism, University of Oxford, Churchill Hospital, Oxford, UK
4. Wellcome Trust Centre for Human Genetics, University of Oxford, Oxford, UK.
5. Department of Genetic Medicine and Development, University of Geneva Medical School, Geneva, Switzerland
6. Wellcome Trust Sanger Institute, Wellcome Trust Genome Campus, Hinxton, UK
7. University of Cambridge, Cambridge, UK
8. European Bioinformatics Institute, Hinxton, UK
9. University of Cambridge Metabolic Research Labs, Institute of Metabolic Science Addenbrooke's Hospital Cambridge, UK
10. Cambridge NIHR Biomedical Research Centre, Addenbrooke's Hospital, Cambridge, UK
11. Oxford NIHR Biomedical Research Centre, Churchill Hospital, Oxford, UK
12. St. John's Institute of Dermatology, King's College London, London, UK

### ***Acknowledgements***

The MuTHER Study was funded by a program grant from the Wellcome Trust (081917/Z/07/Z) and core funding for the Wellcome Trust Centre for Human Genetics (090532). Additional funding came from European Community's Seventh Framework Programme (FP7/2007-2013)/grant agreement, ENGAGE project grant agreement HEALTH-F4-2007-201413, the Swiss National Science Foundation, the Louis-Jeantet Foundation and a National Institutes of Health-NIMH grant (GTEx project). The study also receives support from the Dept of Health via the National Institute for Health Research (NIHR) comprehensive Biomedical Research Centre award to Guy's & St Thomas' NHS Foundation Trust in partnership with King's College London and a Biotechnology and Biological Sciences Research Council (BBSRC) project grant (G20234). The authors also

acknowledge the funding and support of the National Eye Institute via an NIH/CIDR genotyping project (PI: Terri Young). We thank the staff from the Genotyping Facilities and Variation Informatics at the Wellcome Trust Sanger Institute for sample preparation, Quality Control. Genotyping was also performed by CIDR as part of an NEI/NIH project grant. TDS is an NIHR senior Investigator and ERC Senior Investigator. NS, LP and MIM are supported by the Wellcome Trust (Core Grant Number 091746/Z/10/Z, WT077192/Z/05/Z and 083270/Z/07/Z, respectively).

The ALSPAC study was supported by The UK Medical Research Council (Grant ref: 74882) the Wellcome Trust (Grant ref: 076467) and the University of Bristol provide core support for ALSPAC. The ALSPAC cell line resource was developed with funding from the Wellcome Trust grant WT062199MA. This publication is the work of the authors and George Davey Smith and Sue Ring will serve as guarantors for the contents of this paper. We are extremely grateful to all the families who took part in the ALSPAC study, the midwives for their help in recruiting them, and the whole ALSPAC team, which includes interviewers, computer and laboratory technicians, clerical workers, research scientists, volunteers, managers, receptionists and nurses.

The deCODE work was partly supported by the ENGAGE grant (European Community's Seventh Framework Programme (FP7/2007-2013)/grant agreement, ENGAGE project grant agreement HEALTH-F4-2007-201413).
